# Supplementary material for: Context-dependent selection sculpts mutational landscapes in the normal lung
Source: Research Square preprint supplement (doi:10.21203/rs.3.rs-10195584/v1), 2026-07-02
Supplement: Supplementary file 1 [file 6c3bc69fc149795a2d3375fd.xlsx]

## Sheet: allSamples
sample	cohort	lab_id	site	anyCancer	lungCancer	type_and_stage	age	sex	race	smoking_status	pack_years	Height (cm)	Weight (kg)	BMI	regionID	smoking_statusNew
337	PEACE	CRUKP0712	Not known	yes	yes	NSCLC_Squamous cell carcinoma	65	F		Former	76.5	162	55	20.9572		Ever
341	PEACE	CRUKP2037	Right lobe	yes	yes	NSCLC_Large cell	89	F		Former	12.5	150	60	26.6667		Ever
345	PEACE	CRUKP8508	LUL	yes	no	Oesophageal	66	M		Former	0.2	178	75.1	23.7028		Ever
348	PEACE	CRUKP2330	LLL	yes	no	Skin Cancer - Melanoma	29	M		Former	Unknown	169.4	86.9	30.2826		Ever
350	PEACE	CRUKP9145	Not known	yes	yes	NSCLC_Squamous cell carcinoma	61	M		Former	33.75	168	60	21.2585		Ever
351	PEACE	CRUKP8172	RLL	yes	yes	NSCLC_Adenocarcinoma	71	F		Former	12	162	61	23.2434		Ever
352	PEACE	CRUKP3581	RLL	yes	yes	NSCLC_Adenocarcinoma	20	F		Former	20	167	47.4	16.9959		Ever
353	PEACE	CRUKP8780	RLL	yes	yes	NSCLC_Squamous cell carcinoma	78	M		Former	49	169	50.8	17.7865		Ever
354	PEACE	CRUKP9198	RUL	yes	yes	NSCLC_Adenocarcinoma	87	M		Former	5.85	176	87.3	28.1831		Ever
355	PEACE	CRUKP9375	RUL	yes	yes	NSCLC_Squamous cell carcinoma	63	M		Former	120	170	56.2	19.4464		Ever
356	PEACE	CRUKP1584	LUL	yes	yes	NSCLC_Adenocarcinoma	64	F		Former	45					Ever
357	PEACE	CRUKP7741	LUL	yes	yes	NSCLC_Large cell	80	M		Former	180	185	73.8	21.5632		Ever
358	PEACE	CRUKP9920	LLL	yes	no	Bladder Cancer	71	M		Current	52	180	73.3	22.6235		Ever
359	PEACE	CRUKP1233	RUL	yes	no	Other - Specify	71	M		Former	17	180	102	31.4815		Ever
360	PEACE	CRUKP6491	RL	yes	no	Ovarian Cancer	46	F		Former	Unknown	160	47.8	18.6719		Ever
362	PEACE	CRUKP9607	RL	yes	no	Ovarian Cancer - Fallopian Tube Cancer	69	F		Never	0	156	67.1	27.5723		Never
363	PEACE	CRUKP6183	RUL	yes	no	Skin Cancer - Melanoma	64	M		Never	0	182	95.2	28.7405		Never
365	PEACE	CRUKP1842		yes	no	Skin Cancer - Melanoma	28	M		Never	0	181.5	82.4	25.0135		Never
366	PEACE	CRUKP2980		yes	no	Skin Cancer - Melanoma	65	M		Never	0	173.3	91	30.3001		Never
367	PEACE	CRUKP1614		yes	no	Skin Cancer - Melanoma	70	M		Unknown	Unknown					Unknown
368	PEACE	CRUKP7989		yes	no	Kidney Cancer	54	M		Never	0	173.4	100.5	33.4247		Never
369	PEACE	CRUKP6216		yes	no	Skin Cancer - Melanoma	78	F		Never	0	156.8	47.6	19.3604		Never
370	PEACE	CRUKP1599		yes	no	Skin Cancer - Melanoma	75	F		Former	12.5	163	71.6	26.9487		Ever
371	PEACE	CRUKP2907		yes	no	Kidney Cancer	78	M		Former	Unknown	162	60.6	23.091		Ever
372	PEACE	CRUKP9301		yes	no	Kidney Cancer	52	M		Never	0	171	87.9	30.0605		Never
373	PEACE	CRUKP2378		yes	no	Skin Cancer - Melanoma	69	F		Never	0	163	73.6	27.7015		Never
374	PEACE	CRUKP7864		yes	no	Skin Cancer - Melanoma	75	M		Never	0					Never
375	PEACE	CRUKP2507		yes	no	Skin Cancer - Melanoma	66	M		Never	0	167.3	61.4	21.937		Never
376	PEACE	CRUKP0195		yes	no	Skin Cancer - Melanoma	85	M		Unknown	Unknown					Unknown
377	PEACE	CRUKP4650		yes	no	Eye Cancer - Intraocular Melanoma	80	M		Former	40	160	59.8	23.3594		Ever
378	PEACE	CRUKP3464		yes	no	Skin Cancer - Melanoma	91	F		Unknown	Unknown					Unknown
379	PEACE	CRUKP3069		yes	no	Renal Cell (Kidney) Cancer	60	M		Former	Unknown	193	74.6	20.0274		Ever
380	PEACE	CRUKP6098		yes	no	Kidney Cancer	74	M		Never	0	193	126.6	33.9875		Never
381	PEACE	CRUKP2313		yes	no	Kidney Cancer	71	F		Never	0	161	63.6	24.5361		Never
382	PEACE	CRUKP2266		yes	no	Renal Cell (Kidney) Cancer	41	F		Unknown	Unknown					Unknown
383	PEACE	CRUKP5618		yes	no	Renal Cell (Kidney) Cancer	59	M		Never	0	178	76.5	24.1447		Never
384	PEACE	CRUKP6815		yes	no	Kidney Cancer	70	M		Never	0	179.5	65.4	20.2978		Never
385	PEACE	CRUKP8949		yes	no	Skin Cancer - Melanoma	78	F		Never	0	155.7	45.2	18.6449		Never
386	PEACE	CRUKP4807		yes	no	Skin Cancer - Melanoma	55	F		Never	0	172	103.3	34.9175		Never
387	PEACE	CRUKP1165		yes	no	Kidney Cancer	93	M		Former	46	171	66.8	22.8446		Ever
388	PEACE	CRUKP2339		yes	no	Kidney Cancer	52	F		Never	0					Never
389	PEACE	CRUKP6623		yes	no	Skin Cancer	56	F		Former	Unknown					Ever
390	PEACE	CRUKP1362		yes	yes	NSCLC_Squamous cell carcinoma	76	F		Former	Unknown	164.5	50.6	18.699		Ever
391	PEACE	CRUKP0031		yes	no	Renal Cell (Kidney) Cancer	50	F		Never	0	168	77.2	27.3526		Never
392	PEACE	CRUKP7588		yes	no	Renal Cell (Kidney) Cancer	66	M		Never	0					Never
393	PEACE	CRUKP9267		yes	yes	NSCLC_Adenocarcinoma	70	M		Former	Unknown	175	84.5	27.5918		Ever
394	PEACE	CRUKP7448		yes	no	Eye Cancer - Intraocular Melanoma	83	M		Former	Unknown	183	73	21.7982		Ever
395	PEACE	CRUKP4685		yes	no	Intraocular Melanoma	53	F		Never	0	176	77.1	24.8902		Never
396	PEACE	CRUKP3201		yes	no	Prostate Cancer	65	M		Former	Unknown	173	51.1	17.0737		Ever
397	PEACE	CRUKP2213		yes	yes	NSCLC_Adenocarcinoma	57	F		Never	0	153	53.1	22.6836		Never
398	PEACE	CRUKP2112		yes	no	Eye Cancer - Intraocular Melanoma	67	M		Never	0	180	83.1	25.6481		Never
399	PEACE	CRUKP7090		yes	no	Eye Cancer - Intraocular Melanoma	51	M		Unknown	Unknown					Unknown
400	PEACE	CRUKP2363		yes	yes	NSCLC_Adenocarcinoma	41	F		Unknown	Unknown					Unknown
401	PEACE	CRUKP0646		yes	no	Kidney Cancer	49	F		Never	0					Never
402	PEACE	CRUKP3814		yes	no	Prostate Cancer	82	M		Never	0	182	80.8	24.3932		Never
403	PEACE	CRUKP4256		yes	yes	NSCLC_Adenocarcinoma	69	F		Former	Unknown	171	90.6	30.9839		Ever
404	PEACE	CRUKP7216		yes	yes	NSCLC_Adenocarcinoma	84	F		Former	Unknown	151	60	26.3146		Ever
405	PEACE	CRUKP2758		yes	no	Skin Cancer - Melanoma	59	F		Former	Unknown					Ever
406	PEACE	CRUKP5699		yes	no	Paraganglioma	55	M		Former	75					Ever
407	PEACE	CRUKP9911		yes	no	Eye Cancer - Intraocular Melanoma	71	F		Former	Unknown	158	66.3	26.5582		Ever
408	PEACE	CRUKP0279		yes	yes	NSCLC_Other	58	M		Former	Unknown	183	86	25.6801		Ever
409	PEACE	CRUKP9617		yes	no	Breast Cancer	45	F		Never	0	175	72	23.5102		Never
410	PEACE	CRUKP5339		yes	no	Prostate Cancer	55	M		Never	0	175	81	26.449		Never
507	PEACE	CRUKP4366		yes	no	renal cell (kidney)	75	F		Unknown	Unknown					Unknown
508	PEACE	CRUKP2225		yes	no	melanoma	80	M		Former	61.25					Ever
509	PEACE	CRUKP5985		yes	no	melanoma	57	F		Former	20	187	128.4	36.7182		Ever
844	TRACERx	CRUK0063		yes	yes	lung	64	M	White- British	Current	92	187.9	75	21.2426		Current
845	TRACERx	CRUK0085		yes	yes	lung	77	M	White- British	Current	50.25	165	85	31.2213		Current
846	TRACERx	CRUK0042		yes	yes	lung	67	M	White- British	Never	0	194	103	27.3674		Never
847	TRACERx	CRUK0183		yes	yes	lung	55	F		Current	84	154.9	70.5	29.3823		Current
848	TRACERx	CRUK0010		yes	yes	lung	67	M	White- British	Never	0	183	96.2	28.7259		Never
849	TRACERx	CRUK0118		yes	yes	lung	68	F		Current	40	159	72.9	28.8359		Current
850	TRACERx	CRUK0033		yes	yes	lung	68	M	White- British	Never	0	183	93.6	27.9495		Never
851	TRACERx	CRUK0202		yes	yes	lung	68	F		Current	18.8	161	45.9	17.7077		Current
852	TRACERx	CRUK0019		yes	yes	lung	54	F	White- British	Never	0	161.5	76.5	29.3303		Never
853	TRACERx	CRUK0014		yes	yes	lung	66	M	White- British	Never	0	175	86.6	28.2776		Never
854	TRACERx	CRUK0279		yes	yes	lung	80	F	White- British	Never	0	147	53.8	24.897		Never
855	TRACERx	CRUK0297		yes	yes	lung	85	M	White- Irish	Never	0	173	70	23.3887		Never
856	TRACERx	CRUK0247		yes	yes	lung	64	F	White- British	Current	48	155	45	18.7305		Current
857	TRACERx	CRUK0331		yes	yes	lung	53	M	White- British	Never	0	177.6	89.1	28.2483		Never
858	TRACERx	CRUK0305		yes	yes	lung	57	F	White- British	Never	0	164	75	27.8852		Never
859	TRACERx	CRUK0385		yes	yes	lung	56	F	White- British	Current	19	171	68.2	23.3234		Current
860	TRACERx	CRUK0455		yes	yes	lung	59	F	White- British	Current	40	155	51	21.2279		Current
861	TRACERx	CRUK0492		yes	yes	lung	58	F	Indian	Never	0	155	58	24.1415		Never
862	TRACERx	CRUK0480		yes	yes	lung	40	F	White- British	Never	0	147	47	21.7502		Never
863	TRACERx	CRUK0472		yes	yes	lung	67	F	White- British	Current	50	167	74.9	26.8565		Current
864	TRACERx	CRUK0450		yes	yes	lung	59	F	White- British	Current	33.75	164	50	18.5901		Current
865	TRACERx	CRUK0446		yes	yes	lung	38	M	White- British	Current	38	175	65	21.2245		Current
866	TRACERx	CRUK0537		yes	yes	lung	57	F	White- Irish	Current	57	156	56.2	23.0934		Current
867	TRACERx	CRUK0524		yes	yes	lung	65	M	White- British	Never	0	176	102	32.9287		Never
868	TRACERx	CRUK0629		yes	yes	lung	67	F	White- British	Never	0	167	54	19.3625		Never
869	TRACERx	CRUK0688		yes	yes	lung	68	M	White- British	Current	39	180	92	28.3951		Current
870	TRACERx	CRUK0650		yes	yes	lung	56	F	White- British	Current	40	171	51	17.4413		Current
871	TRACERx	CRUK0752		yes	yes	lung	60	F	White- British	Current	45	159	65.2	25.7901		Current
872	TRACERx	CRUK0714		yes	yes	lung	62	M	White- British	Current	34.3	168	71	25.1559		Current
873	TRACERx	CRUK0771		yes	yes	lung	38	M	White and Black Caribbean	Current	9.2	182	87	26.2649		Current
874	TRACERx	CRUK0909		yes	yes	lung	49	M	White- British	Current	29	179	75	23.4075		Current
875	TRACERx	CRUK0968		yes	yes	lung	79	F	White- British	Never	0	146	49	22.9874		Never
876	TRACERx	CRUK0987		yes	yes	lung	76	M	White- British	Current	58	167	56.6	20.2947		Current
877	TRACERx	CRUK1044		yes	yes	lung	69	M	White- British	Current	121.5	152	47	20.3428		Current
878	TRACERx	CRUK1083		yes	yes	lung	60	F	White- British	Current	34.5	152	67.8	29.3456		Current
879	TRACERx	CRUK1156		yes	yes	lung	49	M	White- British	Current	35	175	84	27.4286		Current
880	TRACERx	CRUK1196		yes	yes	lung	83	F	White- British	Never	0	162	60	22.8624		Never
881	TRACERx	CRUK1186		yes	yes	lung	69	F	White- British	Current	24.5	161	52.7	20.331		Current
882	TRACERx	CRUK1162		yes	yes	lung	64	F	White- British	Never	0	158.5	96.2	38.2927		Never
883	TRACERx	CRUK1248		yes	yes	lung	66	F		Never	0	170	57	19.7232		Never
884	TRACERx	CRUK1290		yes	yes	lung	64	M	White- British	Current	38.25	174	96.9	32.0055		Current
885	TRACERx	CRUK1265		yes	yes	lung	56	M	White- British	Current	30	172	77.1	26.0614		Current
886	TRACERx	CRUK1299		yes	yes	lung	52	M	African	Never	0	166	64.5	23.4069		Never
887	TRACERx	CRUK1320		yes	yes	lung	74	F	Indian	Never	0	153	79.1	33.7904		Never
888	TRACERx	CRUK1345		yes	yes	lung	44	F	Asian- Other	Never	0	161	76	29.3199		Never
889	TRACERx	CRUK1351		yes	yes	lung	59	F		Current	40	161	64	24.6904		Current
890	TRACERx	CRUK1397		yes	yes	lung	75	F	White- British	Never	0	158	56.9	22.7928		Never
891	TRACERx	CRUK1325		yes	yes	lung	64	F	Caribbean	Never	0	161	95.4	36.8041		Never
892	TRACERx	CRUK0034		yes	yes	lung	67	F	White- Irish	Former	35	157.3	99.8	40.3342		Former
893	TRACERx	CRUK0071		yes	yes	lung	66	M	White- British	Former	80	170	82	28.3737		Former
894	TRACERx	CRUK0091		yes	yes	lung	49	F	White- British	Former	34	155	66.1	27.513		Former
895	TRACERx	CRUK0051		yes	yes	lung	75	M	White- British	Former	73.5	164	73.6	27.3647		Former
896	TRACERx	CRUK0095		yes	yes	lung	58	F	White- British	Former	19.8	155	76	31.6337		Former
897	TRACERx	CRUK0089		yes	yes	lung	66	M	White- British	Former	15	173	66.2	22.119		Former
898	TRACERx	CRUK0096		yes	yes	lung	73	F	White- British	Former	53	158	58	23.2335		Former
899	TRACERx	CRUK0038		yes	yes	lung	81	F	White- British	Former	30	157.4	75.8	30.5957		Former
900	TRACERx	CRUK0083		yes	yes	lung	71	M	White- British	Former	50	172	79	26.7036		Former
901	TRACERx	CRUK0162		yes	yes	lung	59	M	White- British	Former	122.5	174	62	20.4783		Former
902	TRACERx	CRUK0009		yes	yes	lung	55	M	White- British	Former	10.25	175	71	23.1837		Former
903	TRACERx	CRUK0270		yes	yes	lung	67	M	White- British	Former	162	168	83.1	29.443		Former
904	TRACERx	CRUK0048		yes	yes	lung	75	F	White- British	Former	56	155	82.4	34.2976		Former
905	TRACERx	CRUK0223		yes	yes	lung	62	M	White- British	Former	40	173	86.3	28.8349		Former
906	TRACERx	CRUK0381		yes	yes	lung	52	F	White- British	Former	30	164	62.4	23.2005		Former
907	TRACERx	CRUK0333		yes	yes	lung	63	F	White- British	Former	29.9	162	49	18.6709		Former
908	TRACERx	CRUK0368		yes	yes	lung	81	M	White- British	Former	35	164	69.2	25.7287		Former
909	TRACERx	CRUK0382		yes	yes	lung	91	M	White- Irish	Former	30	172	99.3	33.5654		Former
910	TRACERx	CRUK0350		yes	yes	lung	70	M	White- British	Former	27.5	156	54	22.1893		Former
911	TRACERx	CRUK0497		yes	yes	lung	70	M	White- British	Former	50	160	79.6	31.0937		Former
912	TRACERx	CRUK0413		yes	yes	lung	84	F	White- British	Former	27	169.5	75.6	26.3137		Former
913	TRACERx	CRUK0431		yes	yes	lung	62	M	White- British	Former	20	175	98	32		Former
914	TRACERx	CRUK0402		yes	yes	lung	79	M	White- British	Former	75	182	85.6	25.8423		Former
915	TRACERx	CRUK0403		yes	yes	lung	89	M	White- British	Former	144	173	75.5	25.2264		Former
916	TRACERx	CRUK0590		yes	yes	lung	73	M	White- British	Former	49.5	173	73	24.3911		Former
917	TRACERx	CRUK0549		yes	yes	lung	64	F	White- British	Former	49	157	68.6	27.8307		Former
918	TRACERx	CRUK0570		yes	yes	lung	79	F	White- British	Former	40.5	157	65.8	26.6948		Former
919	TRACERx	CRUK0512		yes	yes	lung	74	F	White- British	Former	33	170	64.2	22.2145		Former
920	TRACERx	CRUK0543		yes	yes	lung	70	F	White- British	Former	20	157	63.4	25.7211		Former
921	TRACERx	CRUK0511		yes	yes	lung	70	F	White- British	Former	30	166	62	22.4996		Former
922	TRACERx	CRUK0674		yes	yes	lung	77	M	White- British	Former	132	176	100	32.2831		Former
923	TRACERx	CRUK0607		yes	yes	lung	64	F	White- British	Former	40	162	82.2	31.3214		Former
924	TRACERx	CRUK0617		yes	yes	lung	72	F	White- British	Former	64	159	94.8	37.4985		Former
925	TRACERx	CRUK0616		yes	yes	lung	84	M	White- British	Former	30	180	113.2	34.9383		Former
926	TRACERx	CRUK0679		yes	yes	lung	70	F	White- British	Former	30	154	81.2	34.2385		Former
927	TRACERx	CRUK0698		yes	yes	lung	73	F	White- British	Former	47	155	77.6	32.2997		Former
928	TRACERx	CRUK0707		yes	yes	lung	75	M	White- British	Former	54	180	73	22.5309		Former
930	TRACERx	CRUK0804		yes	yes	lung	68	M	White- British	Former	29.25	178	98	30.9304		Former
931	TRACERx	CRUK0871		yes	yes	lung	68	F	White- British	Former	20	169	69	24.1588		Former
932	TRACERx	CRUK0808		yes	yes	lung	65	M	White- British	Former	42	177	83.5	26.6526		Former
933	TRACERx	CRUK0929		yes	yes	lung	80	F	White- British	Former	45	156	63	25.8876		Former
934	TRACERx	CRUK0972		yes	yes	lung	60	M	Pakistani	Former	40	176	81.2	26.2138		Former
935	TRACERx	CRUK0960		yes	yes	lung	78	F	White- British	Former	42	157	64.5	26.1674		Former
936	TRACERx	CRUK0934		yes	yes	lung	75	F	White- British	Former	55	149	76.2	34.3228		Former
937	TRACERx	CRUK0979		yes	yes	lung	77	M	Indian	Former	30.5	173	67.4	22.52		Former
938	TRACERx	CRUK0993		yes	yes	lung	77	F	White- British	Former	35	166.5	81.5	29.3988		Former
939	TRACERx	CRUK1062		yes	yes	lung	80	F	White- British	Former	33	170	108.6	37.5779		Former
64	BDRE	219583	LUL	yes	yes	squamous cell, stage IA	74	M	white	Former	125	182.88	105.687	31.6002		Former
66	BDRE	220357	LUL	yes	yes	adeno, stage IV	64	M	WHITE	Current	50	182.88	78.018	23.3272		Current
68	BDRE	220397	LLL	yes	yes	adeno, stage IB	78	M	WHITE	Never	0	177.8	79.8324	25.2531		Never
70	BDRE	220426	LUL	yes	yes	Adeno, pT2bN0MX IIA	72	M	WHITE	Former	42	180.34	76.2036	23.431		Former
72	BDRE	220511	RML	yes	yes	Adeno carcinoma, pT1bN0M0	64	M	WHITE	Current	35	172.72	74.3892	24.9359		Current
74	BDRE	220392	LUL	no	no	none	71	M	WHITE	Former	8	187.96	90.7186	25.6782		Former
76	BDRE	220424	LLL	no	no	none	78	M	WHITE	Current	64	193.04	102.512	27.5093		Current
78	BDRE	216194	RUL	no	no	none	78	M	WHITE	Never	0	182.88	122.016	36.4826		Never
80	BDRE	220436	LUL	no	no	none	68	M	BLACK	Former	20	175.26	112.945	36.7705		Former
82	BDRE	220530	RUL	no	no	none	74	M	WHITE	Former	9	175.26	83.4611	27.1718		Former
83	BDRE	220427	LB4	yes	yes	Adeno, stage IIIA	52	F	WHITE	Current	20	160.02	70.7605	27.6339		Current
84	BDRE	220517	LUL	yes	yes	Adeno carcinoma, Stage IA	75	M	WHITE	Former	20	190.5	117.481	32.3725		Former
85	BDRE	220451	LINGULA	no	no	none	72	M	WHITE	Former	15	185.42	95.2545	27.7059		Former
128	BDRE	220553	LUL	yes	yes	Early Adeno Carcinoma	75	M	WHITE	Former	100	172.72	71.2141	23.8716		Former
130	BDRE	220581	LINGULA	no	no	none	64	M	WHITE	Never	0	175.26	94.8009	30.8636		Never
132	BDRE	220574	LUL	no	no	none	79	M	WHITE	Former	6	167.64	82.5539	29.3753		Former
133	BDRE	220352	RML	no	no	none	48	M	white	Former	8.5	177.8	93.4401	29.5577		Former
134	BDRE	220480	LLL	no	no	none	73	M	Unknown	Current	60	162.56	58.9671	22.3142		Current
136	BDRE	203410	LUL	yes	yes	Squamous Cell Carcinoma	73	M	WHITE	Former	50	170.18	53.0704	18.3246		Former
138	BDRE	219773	RUL	yes	yes	Malignant	77	M	WHITE	Current	60	185.42	92.9865	27.0462		Current
140	BDRE	220592	LUL	yes	yes	Adenocarcinoma	74	M	WHITE	Current	51	177.8	81.6467	25.8271		Current
143	BDRE	220564	RML	yes	yes	Adenocarcinoma	75	M	WHITE	Former	7.5	177.8	85.7291	27.1184		Former
144	BDRE	220398	LUL	yes	yes	Adeno, stage IV	67	M	WHITE	Current	52	182.88	76.2036	22.7847		Current
146	BDRE	220623	RML	yes	yes	Adenocarcinoma in LLL	71	M	WHITE	Never	0	167.64	111.584	39.7051		Never
148	BDRE	220580	LB6	no	no	none	58	M	BLACK	Current	40	187.96	67.1318	19.0019		Current
150	BDRE	220624	RML	no	no	none	75	M	WHITE	Current	50	177.8	100.698	31.8534		Current
152	BDRE	220631	LUL	no	no	none	71	M	WHITE	Current	30	177.8	58.9671	18.6529		Current
156	BDRE	220561	LUL	yes	yes	adenocarcinoma	70	M	WHITE	Current	60	175.26	111.584	36.3275		Current
157	BDRE	220295	LUL	no	no	none	71	M	WHITE	Former	40	175.26	84.8219	27.6148		Former
158	BDRE	220391	LUL	yes	yes	renal cell metastasized to the lung	72	M	WHITE	Former	20	182.88	90.7186	27.1246		Former
184	BDRE	220599	LUL	yes	yes	Squamous Cell Lung Cancer	74	M	BLACK	Former	50	182.88	85.2755	25.4972		Former
186	BDRE	220608	LUL	yes	yes	Squamous Cell Lung Cancer	64	M	WHITE	Former	67.5	182.88	70.7605	21.1572		Former
187	BDRE	220348	LUL	yes	yes	Adeno, Stage IA	75	M	WHITE	Former	20	175.26	90.7186	29.5346		Former
188	BDRE	220359	Lingula	yes	yes	Adeno, Stage IA	68	M	WHITE	Former	40	182.88	101.151	30.244		Former
324	BDRE	220609	LLL	no	no	none	66	M	WHITE	Current	55	170.18	61.235	21.1438		Current
326	BDRE	220708	RML	yes	yes	Squamous Cell Lung Cancer	59	M	WHITE	Current	40	182.88	109.769	32.8208		Current
328	BDRE	220743	LUL	yes	yes	Squamous Cell Lung Cancer	78	M	WHITE	Former	30	172.72	89.3578	29.9535		Former
330	BDRE	220612	RML	yes	yes	Squamous Cell Lung Cancer	72	M	WHITE	Current	50	180.34	79.3788	24.4073		Current
560	BDRE	220745		yes	yes	Squamous Cell Carcinoma	72	M	BLACK	Current	46	187.96	86.6362	24.5227		Current
562	BDRE	220725		yes	yes	Adenocarcinoma	75	M	BLACK	Former	10	190.5	81.6467	22.4983		Former
563	BDRE	220780		no	no	none	62	M	WHITE	Former	20	185.42	113.398	32.9832		Former
789	multiRegion	CRUKP4357		yes	yes	lung	66	M		Current					N_LU_23	Current
790	multiRegion	CRUKP4357		yes	yes	lung	66	M		Current					N_LU_24	Current
791	multiRegion	CRUKP4357		yes	yes	lung	66	M		Current					N_LU_25	Current
792	multiRegion	CRUKP4357		yes	yes	lung	66	M		Current					N_LU_26	Current
793	multiRegion	CRUKP4357		yes	yes	lung	66	M		Current					N_LU_27	Current
794	multiRegion	CRUKP4357		yes	yes	lung	66	M		Current					N_LU_28	Current
795	multiRegion	CRUKP4357		yes	yes	lung	66	M		Current					N_LU_29	Current
796	multiRegion	CRUKP4357		yes	yes	lung	66	M		Current					N_LU_30	Current
797	multiRegion	CRUKP4357		yes	yes	lung	66	M		Current					N_LU_31	Current
798	multiRegion	CRUKP4357		yes	yes	lung	66	M		Current					N_LU_32	Current
799	multiRegion	CRUKP4357		yes	yes	lung	66	M		Current					N_LU_33	Current
800	multiRegion	CRUKP4357		yes	yes	lung	66	M		Current					N_LU_34	Current
801	multiRegion	CRUKP4357		yes	yes	lung	66	M		Current					N_LU_35	Current
802	multiRegion	CRUKP4357		yes	yes	lung	66	M		Current					N_LU_36	Current
803	multiRegion	CRUKP4357		yes	yes	lung	66	M		Current					N_LU_37	Current
804	multiRegion	CRUKP4357		yes	yes	lung	66	M		Current					N_LU_38	Current
805	multiRegion	CRUKP4357		yes	yes	lung	66	M		Current					N_LU_39	Current
806	multiRegion	CRUKP4357		yes	yes	lung	66	M		Current					N_LU_40	Current
504	multiRegion	CRUKP6470		yes	no	Prostate	62	M		Never	0				N_LU_32	Never
505	multiRegion	CRUKP6470		yes	no	Prostate	62	M		Never	0				N_LU_33	Never
506	multiRegion	CRUKP6470		yes	no	Prostate	62	M		Never	0				N_LU_39	Never
525	multiRegion	CRUKP6470		yes	no	Prostate	62	M		Never	0				N_LU_24	Never
526	multiRegion	CRUKP6470		yes	no	Prostate	62	M		Never	0				N_LU_26	Never
527	multiRegion	CRUKP6470		yes	no	Prostate	62	M		Never	0				N_LU_27	Never
528	multiRegion	CRUKP6470		yes	no	Prostate	62	M		Never	0				N_LU_28	Never
529	multiRegion	CRUKP6470		yes	no	Prostate	62	M		Never	0				N_LU_29	Never
530	multiRegion	CRUKP6470		yes	no	Prostate	62	M		Never	0				N_LU_30	Never
531	multiRegion	CRUKP6470		yes	no	Prostate	62	M		Never	0				N_LU_31	Never
532	multiRegion	CRUKP6470		yes	no	Prostate	62	M		Never	0				N_LU_25	Never
533	multiRegion	CRUKP6470		yes	no	Prostate	62	M		Never	0				N_LU_34	Never
534	multiRegion	CRUKP6470		yes	no	Prostate	62	M		Never	0				N_LU_35	Never
535	multiRegion	CRUKP6470		yes	no	Prostate	62	M		Never	0				N_LU_36	Never
536	multiRegion	CRUKP6470		yes	no	Prostate	62	M		Never	0				N_LU_37	Never
537	multiRegion	CRUKP6470		yes	no	Prostate	62	M		Never	0				N_LU_38	Never
538	multiRegion	CRUKP6470		yes	no	Prostate	62	M		Never	0				N_LU_40	Never
539	multiRegion	CRUKP6470		yes	no	Prostate	62	M		Never	0				N_LU_41	Never
540	multiRegion	CRUKP6470		yes	no	Prostate	62	M		Never	0				N_LU_42	Never
541	multiRegion	CRUKP6470		yes	no	Prostate	62	M		Never	0				N_LU_43	Never
542	multiRegion	CRUKP6470		yes	no	Prostate	62	M		Never	0				N_LU_44	Never
543	multiRegion	CRUKP6470		yes	no	Prostate	62	M		Never	0				N_LU_45	Never
544	multiRegion	CRUKP6470		yes	no	Prostate	62	M		Never	0				N_LU_46	Never
545	multiRegion	CRUKP6470		yes	no	Prostate	62	M		Never	0				N_LU_47	Never
546	multiRegion	CRUKP6470		yes	no	Prostate	62	M		Never	0				N_LU_48	Never
547	multiRegion	CRUKP6470		yes	no	Prostate	62	M		Never	0				N_LU_49	Never
548	multiRegion	CRUKP6470		yes	no	Prostate	62	M		Never	0				N_LU_51	Never
549	multiRegion	CRUKP6470		yes	no	Prostate	62	M		Never	0				N_LU_52	Never
550	multiRegion	CRUKP6470		yes	no	Prostate	62	M		Never	0				N_LU_53	Never
551	multiRegion	CRUKP6470		yes	no	Prostate	62	M		Never	0				N_LU_54	Never
552	multiRegion	CRUKP6470		yes	no	Prostate	62	M		Never	0				N_LU_55	Never
553	multiRegion	CRUKP6470		yes	no	Prostate	62	M		Never	0				N_LU_56	Never
554	multiRegion	CRUKP6470		yes	no	Prostate	62	M		Never	0				N_LU_57	Never
555	multiRegion	CRUKP6470		yes	no	Prostate	62	M		Never	0				N_LU_58	Never
478	multiRegion	CRUKP4374		yes	no	glioblastoma	64	M		Never	0				N_LU_26	Never
479	multiRegion	CRUKP4374		yes	no	glioblastoma	64	M		Never	0				N_LU_29	Never
480	multiRegion	CRUKP4374		yes	no	glioblastoma	64	M		Never	0				N_LU_30	Never
481	multiRegion	CRUKP4374		yes	no	glioblastoma	64	M		Never	0				N_LU_31	Never
482	multiRegion	CRUKP4374		yes	no	glioblastoma	64	M		Never	0				N_LU_32	Never
483	multiRegion	CRUKP4374		yes	no	glioblastoma	64	M		Never	0				N_LU_33	Never
484	multiRegion	CRUKP4374		yes	no	glioblastoma	64	M		Never	0				N_LU_35	Never
485	multiRegion	CRUKP4374		yes	no	glioblastoma	64	M		Never	0				N_LU_37	Never
486	multiRegion	CRUKP4374		yes	no	glioblastoma	64	M		Never	0				N_LU_40	Never
487	multiRegion	CRUKP4374		yes	no	glioblastoma	64	M		Never	0				N_LU_43	Never
488	multiRegion	CRUKP4374		yes	no	glioblastoma	64	M		Never	0				N_LU_44	Never
489	multiRegion	CRUKP4374		yes	no	glioblastoma	64	M		Never	0				N_LU_45	Never
490	multiRegion	CRUKP4374		yes	no	glioblastoma	64	M		Never	0				N_LU_46	Never
491	multiRegion	CRUKP4374		yes	no	glioblastoma	64	M		Never	0				N_LU_47	Never
492	multiRegion	CRUKP4374		yes	no	glioblastoma	64	M		Never	0				N_LU_48	Never
493	multiRegion	CRUKP4374		yes	no	glioblastoma	64	M		Never	0				N_LU_49	Never
494	multiRegion	CRUKP4374		yes	no	glioblastoma	64	M		Never	0				N_LU_50	Never
495	multiRegion	CRUKP4374		yes	no	glioblastoma	64	M		Never	0				N_LU_52	Never
496	multiRegion	CRUKP4374		yes	no	glioblastoma	64	M		Never	0				N_LU_57	Never
497	multiRegion	CRUKP4374		yes	no	glioblastoma	64	M		Never	0				N_LU_58	Never
498	multiRegion	CRUKP4374		yes	no	glioblastoma	64	M		Never	0				N_LU_59	Never
499	multiRegion	CRUKP4374		yes	no	glioblastoma	64	M		Never	0				N_LU_61	Never
500	multiRegion	CRUKP4374		yes	no	glioblastoma	64	M		Never	0				N_LU_62	Never
501	multiRegion	CRUKP4374		yes	no	glioblastoma	64	M		Never	0				N_LU_63	Never
503	multiRegion	CRUKP4374		yes	no	glioblastoma	64	M		Never	0				N_LU_65	Never
511	multiRegion	CRUKP4374		yes	no	glioblastoma	64	M		Never	0				N_LU_27	Never
512	multiRegion	CRUKP4374		yes	no	glioblastoma	64	M		Never	0				N_LU_28	Never
513	multiRegion	CRUKP4374		yes	no	glioblastoma	64	M		Never	0				N_LU_34	Never
514	multiRegion	CRUKP4374		yes	no	glioblastoma	64	M		Never	0				N_LU_36	Never
515	multiRegion	CRUKP4374		yes	no	glioblastoma	64	M		Never	0				N_LU_38	Never
516	multiRegion	CRUKP4374		yes	no	glioblastoma	64	M		Never	0				N_LU_39	Never
517	multiRegion	CRUKP4374		yes	no	glioblastoma	64	M		Never	0				N_LU_41	Never
518	multiRegion	CRUKP4374		yes	no	glioblastoma	64	M		Never	0				N_LU_42	Never
519	multiRegion	CRUKP4374		yes	no	glioblastoma	64	M		Never	0				N_LU_51	Never
520	multiRegion	CRUKP4374		yes	no	glioblastoma	64	M		Never	0				N_LU_53	Never
521	multiRegion	CRUKP4374		yes	no	glioblastoma	64	M		Never	0				N_LU_54	Never
522	multiRegion	CRUKP4374		yes	no	glioblastoma	64	M		Never	0				N_LU_55	Never
523	multiRegion	CRUKP4374		yes	no	glioblastoma	64	M		Never	0				N_LU_56	Never
524	multiRegion	CRUKP4374		yes	no	glioblastoma	64	M		Never	0				N_LU_60	Never
459	multiRegion	CRUKP5423		yes	no	Melanoma	85	M		Former	12				N_LU_19	Former
460	multiRegion	CRUKP5423		yes	no	Melanoma	85	M		Former	12				N_LU_20	Former
461	multiRegion	CRUKP5423		yes	no	Melanoma	85	M		Former	12				N_LU_21	Former
462	multiRegion	CRUKP5423		yes	no	Melanoma	85	M		Former	12				N_LU_22	Former
463	multiRegion	CRUKP5423		yes	no	Melanoma	85	M		Former	12				N_LU_23	Former
464	multiRegion	CRUKP5423		yes	no	Melanoma	85	M		Former	12				N_LU_24	Former
465	multiRegion	CRUKP5423		yes	no	Melanoma	85	M		Former	12				N_LU_25	Former
466	multiRegion	CRUKP5423		yes	no	Melanoma	85	M		Former	12				N_LU_26	Former
467	multiRegion	CRUKP5423		yes	no	Melanoma	85	M		Former	12				N_LU_27	Former
468	multiRegion	CRUKP5423		yes	no	Melanoma	85	M		Former	12				N_LU_28	Former
469	multiRegion	CRUKP5423		yes	no	Melanoma	85	M		Former	12				N_LU_29	Former
470	multiRegion	CRUKP5423		yes	no	Melanoma	85	M		Former	12				N_LU_30	Former
471	multiRegion	CRUKP5423		yes	no	Melanoma	85	M		Former	12				N_LU_31	Former
472	multiRegion	CRUKP5423		yes	no	Melanoma	85	M		Former	12				N_LU_32	Former
473	multiRegion	CRUKP5423		yes	no	Melanoma	85	M		Former	12				N_LU_33	Former
474	multiRegion	CRUKP5423		yes	no	Melanoma	85	M		Former	12				N_LU_34	Former
475	multiRegion	CRUKP5423		yes	no	Melanoma	85	M		Former	12				N_LU_35	Former
476	multiRegion	CRUKP5423		yes	no	Melanoma	85	M		Former	12				N_LU_36	Former
477	multiRegion	CRUKP5423		yes	no	Melanoma	85	M		Former	12				N_LU_37	Former
510	multiRegion	CRUKP5423		yes	no	Melanoma	85	M		Former	12				N_LU_38	Former
693	multiRegion	CRUKP5309		yes	no	metastatic melanoma	50	F		Current	20				N_LU_14	Current
694	multiRegion	CRUKP5309		yes	no	metastatic melanoma	50	F		Current	20				N_LU_15	Current
697	multiRegion	CRUKP5309		yes	no	metastatic melanoma	50	F		Current	20				N_LU_15	Current
698	multiRegion	CRUKP5309		yes	no	metastatic melanoma	50	F		Current	20				N_LU_16	Current
699	multiRegion	CRUKP5309		yes	no	metastatic melanoma	50	F		Current	20				N_LU_17	Current
700	multiRegion	CRUKP5309		yes	no	metastatic melanoma	50	F		Current	20				N_LU_18	Current
701	multiRegion	CRUKP5309		yes	no	metastatic melanoma	50	F		Current	20				N_LU_19	Current
702	multiRegion	CRUKP5309		yes	no	metastatic melanoma	50	F		Current	20				N_LU_20	Current
703	multiRegion	CRUKP5309		yes	no	metastatic melanoma	50	F		Current	20				N_LU_21	Current
704	multiRegion	CRUKP5309		yes	no	metastatic melanoma	50	F		Current	20				N_LU_22	Current
705	multiRegion	CRUKP5309		yes	no	metastatic melanoma	50	F		Current	20				N_LU_23	Current
706	multiRegion	CRUKP5309		yes	no	metastatic melanoma	50	F		Current	20				N_LU_24	Current
707	multiRegion	CRUKP5309		yes	no	metastatic melanoma	50	F		Current	20				N_LU_25	Current
708	multiRegion	CRUKP5309		yes	no	metastatic melanoma	50	F		Current	20				N_LU_26	Current
709	multiRegion	CRUKP5309		yes	no	metastatic melanoma	50	F		Current	20				N_LU_27	Current
710	multiRegion	CRUKP5309		yes	no	metastatic melanoma	50	F		Current	20				N_LU_28	Current
711	multiRegion	CRUKP5309		yes	no	metastatic melanoma	50	F		Current	20				N_LU_29	Current
712	multiRegion	CRUKP5309		yes	no	metastatic melanoma	50	F		Current	20				N_LU_30	Current
713	multiRegion	CRUKP5309		yes	no	metastatic melanoma	50	F		Current	20				N_LU_31	Current
714	multiRegion	CRUKP5309		yes	no	metastatic melanoma	50	F		Current	20				N_LU_32	Current
715	multiRegion	CRUKP5309		yes	no	metastatic melanoma	50	F		Current	20				N_LU_33	Current
716	multiRegion	CRUKP5309		yes	no	metastatic melanoma	50	F		Current	20				N_LU_34	Current
717	multiRegion	CRUKP5309		yes	no	metastatic melanoma	50	F		Current	20				N_LU_35	Current
718	multiRegion	CRUKP5309		yes	no	metastatic melanoma	50	F		Current	20				N_LU_36	Current
719	multiRegion	CRUKP5309		yes	no	metastatic melanoma	50	F		Current	20				N_LU_37	Current
720	multiRegion	CRUKP5309		yes	no	metastatic melanoma	50	F		Current	20				N_LU_38	Current
721	multiRegion	CRUKP5309		yes	no	metastatic melanoma	50	F		Current	20				N_LU_39	Current
722	multiRegion	CRUKP5309		yes	no	metastatic melanoma	50	F		Current	20				N_LU_40	Current
723	multiRegion	CRUKP5309		yes	no	metastatic melanoma	50	F		Current	20				N_LU_41	Current
724	multiRegion	CRUKP5309		yes	no	metastatic melanoma	50	F		Current	20				N_LU_42	Current
725	multiRegion	CRUKP5309		yes	no	metastatic melanoma	50	F		Current	20				N_LU_43	Current
726	multiRegion	CRUKP5309		yes	no	metastatic melanoma	50	F		Current	20				N_LU_44	Current
727	multiRegion	CRUKP5309		yes	no	metastatic melanoma	50	F		Current	20				N_LU_45	Current
728	multiRegion	CRUKP5309		yes	no	metastatic melanoma	50	F		Current	20				N_LU_46	Current
729	multiRegion	CRUKP5309		yes	no	metastatic melanoma	50	F		Current	20				N_LU_47	Current
730	multiRegion	CRUKP5309		yes	no	metastatic melanoma	50	F		Current	20				N_LU_48	Current
731	multiRegion	CRUKP5309		yes	no	metastatic melanoma	50	F		Current	20				N_LU_49	Current
732	multiRegion	CRUKP5309		yes	no	metastatic melanoma	50	F		Current	20				N_LU_50	Current
733	multiRegion	CRUKP5309		yes	no	metastatic melanoma	50	F		Current	20				N_LU_51	Current
734	multiRegion	CRUKP5309		yes	no	metastatic melanoma	50	F		Current	20				N_LU_52	Current
735	multiRegion	CRUKP5309		yes	no	metastatic melanoma	50	F		Current	20				N_LU_53	Current
736	multiRegion	CRUKP5309		yes	no	metastatic melanoma	50	F		Current	20				N_LU_54	Current
737	multiRegion	CRUKP5309		yes	no	metastatic melanoma	50	F		Current	20				N_LU_55	Current
738	multiRegion	CRUKP5309		yes	no	metastatic melanoma	50	F		Current	20				N_LU_56	Current
739	multiRegion	CRUKP5309		yes	no	metastatic melanoma	50	F		Current	20				N_LU_57	Current
740	multiRegion	CRUKP5309		yes	no	metastatic melanoma	50	F		Current	20				N_LU_59	Current
741	multiRegion	CRUKP5309		yes	no	metastatic melanoma	50	F		Current	20				N_LU_58	Current
742	multiRegion	CRUKP5309		yes	no	metastatic melanoma	50	F		Current	20				N_LU_60	Current
759	multiRegion	CRUKP1557		no	no	none	39	M		Never	0				N_LU_4	Never
760	multiRegion	CRUKP1557		no	no	none	39	M		Never	0				N_LU_5	Never
761	multiRegion	CRUKP1557		no	no	none	39	M		Never	0				N_LU_6	Never
762	multiRegion	CRUKP1557		no	no	none	39	M		Never	0				N_LU_7	Never
763	multiRegion	CRUKP1557		no	no	none	39	M		Never	0				N_LU_8	Never
764	multiRegion	CRUKP1557		no	no	none	39	M		Never	0				N_LU_9	Never
765	multiRegion	CRUKP1557		no	no	none	39	M		Never	0				N_LU_10	Never
766	multiRegion	CRUKP1557		no	no	none	39	M		Never	0				N_LU_11	Never
767	multiRegion	CRUKP1557		no	no	none	39	M		Never	0				N_LU_12	Never
768	multiRegion	CRUKP1557		no	no	none	39	M		Never	0				N_LU_13	Never
769	multiRegion	CRUKP1557		no	no	none	39	M		Never	0				N_LU_14	Never
770	multiRegion	CRUKP1557		no	no	none	39	M		Never	0				N_LU_15	Never
771	multiRegion	CRUKP1557		no	no	none	39	M		Never	0				N_LU_17	Never
772	multiRegion	CRUKP1557		no	no	none	39	M		Never	0				N_LU_18	Never
773	multiRegion	CRUKP1557		no	no	none	39	M		Never	0				N_LU_19	Never
774	multiRegion	CRUK1367		yes	yes	lung	54	F		Never	0				N_LU_1	Never
775	multiRegion	CRUK1367		yes	yes	lung	54	F		Never	0				N_LU_2	Never
776	multiRegion	CRUK1367		yes	yes	lung	54	F		Never	0				N_LU_3	Never
777	multiRegion	CRUK1367		yes	yes	lung	54	F		Never	0				N_LU_4	Never
778	multiRegion	CRUK1367		yes	yes	lung	54	F		Never	0				N_LU_5	Never
779	multiRegion	CRUK1367		yes	yes	lung	54	F		Never	0				N_LU_6	Never
780	multiRegion	CRUK1367		yes	yes	lung	54	F		Never	0				N_LU_7	Never
781	multiRegion	CRUK1367		yes	yes	lung	54	F		Never	0				N_LU_8	Never
782	multiRegion	CRUK1367		yes	yes	lung	54	F		Never	0				N_LU_9	Never
783	multiRegion	CRUK1367		yes	yes	lung	54	F		Never	0				N_LU_10	Never
784	multiRegion	CRUK1367		yes	yes	lung	54	F		Never	0				N_LU_11	Never
785	multiRegion	CRUK1367		yes	yes	lung	54	F		Never	0				N_LU_12	Never
786	multiRegion	CRUK1367		yes	yes	lung	54	F		Never	0				N_LU_13	Never
787	multiRegion	CRUK1367		yes	yes	lung	54	F		Never	0				N_LU_14	Never
788	multiRegion	CRUK1367		yes	yes	lung	54	F		Never	0				N_LU_15	Never

## Sheet: PEACE
sample	cohort	lab_id	site	anyCancer	lungCancer	type_and_stage	age	sex	Height (cm)	Weight (kg)	BMI	smoking_status	pack_years	Chemo	Radio	Immuno	Targeted	Other	Cancer History	Other Notes	Tumour_of_origin	parenchyma_carbon	TumourType	DEMSmkStatus	DEMSmkYrs	DEMSmkNumPerDay	REGSex	BLTownGrewUp	BLTownAdultLf	DEMEthnicity	REGDOB	RegDate	DTHDate	DEMWkOutside	BLEnvAsbest	BLEnvGpYN	BLEnvAfAPQt	BLEnvAfAP	BLEnvAfNQt	BLEnvAfN	BLEnvAfWP	BLEnvAfDWQt	BLEnvAfDW	BLEnvAfSPQt	BLEnvAfSP	BLEnvAfMVQt	BLEnvAfMV	BLEnvAfOth	RegAge
337	PEACE	CRUKP0712	Not known	yes	yes	NSCLC_Squamous cell carcinoma	65	F	162	55	20.9572	Former	76.5		Chest Wall (Right)				Prostate Cancer, Pancreatic Cancer		NSCLC_Squamous cell carcinoma	Yes	Lung Cancer - Non-Small Cell Lung Cancer	Ex-Smoker	51	30	Female	Enniskillen County Fermanagh	Birmingham	White - British	1953-09-05	2019-01-21	2019-02-02	Both	No	No													65
341	PEACE	CRUKP2037	Right lobe	yes	yes	NSCLC_Large cell	89	F	150	60	26.6667	Former	12.5			Atezolizumab			Bowel cancer		NSCLC_Large cell	Yes	Lung Cancer - Non-Small Cell Lung Cancer	Ex-Smoker	25	10	Female	Glasgow	Birmingham	White - British	1930-05-18	2019-03-01	2020-01-18	Indoors	No	No													88
345	PEACE	CRUKP8508	LUL	yes	no	Oesophageal	66	M	178	75.1	23.7028	Former	0.2	Eprubicin Oxaliplatin					Bowel cancer		Oesophageal	Yes	Oesophageal	Ex-Smoker	2	2	Male	Market Bosworth	Barlestone-Nr Market Bosworth	White - British	1952-02-21	2017-12-07	2018-04-25	Both	No	No													65
348	PEACE	CRUKP2330	LLL	yes	no	Skin Cancer - Melanoma	29	M	169.4	86.9	30.2826	Former	Unknown			Ipilimumab Nivolumab	Dabrafenib Trametinib Binimetinib Encorafenib Trametinib Dabrafenib				Skin Cancer - Melanoma	Yes	Skin Cancer - Melanoma	Ex-Smoker	1	-9	Male	Crowborough	Crowborough	White - British	1991-09-30	2021-06-11	2021-08-24	Both	No	No													29
350	PEACE	CRUKP9145	Not known	yes	yes	NSCLC_Squamous cell carcinoma	61	M	168	60	21.2585	Former	33.75									Yes	Lung Cancer - Non-Small Cell Lung Cancer	Recent Ex-Smoker	45	15	Male	Cheltenham	London	White - other (please specify)	1955-12-16	2017-02-22	2017-02-20	Indoors	No	Yes	Somewhat serious	Yes		No	No	Somewhat serious	Yes	Somewhat serious	Yes	Somewhat serious	Yes	No	61
351	PEACE	CRUKP8172	RLL	yes	yes	NSCLC_Adenocarcinoma	71	F	162	61	23.2434	Former	12									Yes	Lung Cancer - Non-Small Cell Lung Cancer	Recent Ex-Smoker	48	5	Female	Liverpool	Formby	White - British	1947-02-17	2018-08-22	2018-08-21		Not known	Yes		Don't know		No	No		No		Don't know	Somewhat serious	Yes	No	71
352	PEACE	CRUKP3581	RLL	yes	yes	NSCLC_Adenocarcinoma	20	F	167	47.4	16.9959	Former	20									Yes	Lung Cancer - Non-Small Cell Lung Cancer	Ex-Smoker	20	20	Female	London	London	White - British	1946-06-12	2019-06-03	2019-09-13	Outdoors	Yes	Yes	Somewhat serious	Yes	Very serious	Yes	Don't know	Somewhat serious	Yes		Don't know	Very serious	Yes	No	72
353	PEACE	CRUKP8780	RLL	yes	yes	NSCLC_Squamous cell carcinoma	78	M	169	50.8	17.7865	Former	49									Yes	Lung Cancer - Non-Small Cell Lung Cancer	Ex-Smoker	49	20	Male	Jamacia	Birmingham	Black - Caribbean	1939-04-09	2017-10-05	2017-12-03	Outdoors	No	No													78
354	PEACE	CRUKP9198	RUL	yes	yes	NSCLC_Adenocarcinoma	87	M	176	87.3	28.1831	Former	5.85									Yes	Lung Cancer - Non-Small Cell Lung Cancer	Ex-Smoker	39	3	Male	Birmingham	Birmingham	White - British	1932-05-23	2018-07-24	2019-06-08	Indoors	No	No													86
355	PEACE	CRUKP9375	RUL	yes	yes	NSCLC_Squamous cell carcinoma	63	M	170	56.2	19.4464	Former	120	Gemcitabine/ Carboplatin Cisplatin/ Vinorelbine	Left mediastinal recurrence Left groin post operative	Atezolizumab			Breast cancer, Pancreatic cancer		NSCLC_Squamous cell carcinoma	Yes	Lung Cancer - Non-Small Cell Lung Cancer	Ex-Smoker	48	50	Male	West Bromwich	Glossop	White - British	1955-03-13	2018-01-30	2018-10-13	Indoors	No	No													62
356	PEACE	CRUKP1584	LUL	yes	yes	NSCLC_Adenocarcinoma	64	F				Former	45									Yes	Lung Cancer - Non-Small Cell Lung Cancer	Recent Ex-Smoker	45	20	Female	Nottingham	Nottingham	White - British	1954-08-04	2018-10-02	2018-09-25	Both	No	No													64
357	PEACE	CRUKP7741	LUL	yes	yes	NSCLC_Large cell	80	M	185	73.8	21.5632	Former	180									Yes	Lung Cancer - Non-Small Cell Lung Cancer	Ex-Smoker	60	60	Male	Manchester	Manchester	White - British	1938-12-29	2019-03-13	2019-04-16		No	Yes	Somewhat serious	Yes	Somewhat serious	Yes	No		No		No	Somewhat serious	Yes	No	80
358	PEACE	CRUKP9920	LLL	yes	no	Bladder Cancer	71	M	180	73.3	22.6235	Current	52	Carboplatin Gemcitabine	Bladder	Pembrolizumab Cabozantinib	Cabozantinib		Prostate Cancer		Bladder Cancer		Bladder Cancer	Current Smoker	52	20	Male	Sawston, Cambridgeshire	Southampton	White - British	1948-03-31	2019-08-07	2020-01-25	Both	No	No													71
359	PEACE	CRUKP1233	RUL	yes	no	Other - Specify	71	M	180	102	31.4815	Former	17						VHL	rdcrmh	pancreatic NET	Yes	Other - Specify	Ex-Smoker	20	17	Male	Ripon - moved to Malta	Gorgleston	White - British	1949-10-07	2021-05-12	2021-05-09	Indoors	Not known	No													71
360	PEACE	CRUKP6491	RL	yes	no	Ovarian Cancer	46	F	160	47.8	18.6719	Former	Unknown					Carboplatin, weekly paclitaxel and Bevasizumab			Ovarian Cancer	Yes	Ovarian Cancer	Ex-Smoker	-9		Female	-9	Puckeridge, Herfordshire	White - British	1973-05-10	2019-06-21	2019-06-25		Not known	-9													46
362	PEACE	CRUKP9607	RL	yes	no	Ovarian Cancer - Fallopian Tube Cancer	69	F	156	67.1	27.5723	Never	0	Carboplatin liposomal doxirubicin weekly paclitaxel Carboplatin Cisplatin Paclitaxel liposomal doxirubicin Gemcitabine liposomal doxirubicin	Whole Brain		letrozole exemestane Tamoxifen	Rucaparib / Placebo	Breast Cancer, Head & Neck Cancer		Ovarian Cancer - Fallopian Tube Cancer	Yes	Ovarian Cancer - Fallopian Tube Cancer	Never Smoked			Female	Enfield, Middlesex.	Nazeing, Broxbourne	White - British	1949-12-15	2019-05-28	2019-09-09	Indoors	No	No													69
363	PEACE	CRUKP6183	RUL	yes	no	Skin Cancer - Melanoma	64	M	182	95.2	28.7405	Never	0		L4-S1 Lumbar Spine T5-T7 Thoracic Spine Pubic Symphysis	Ipilimumab Nivolumab			Breast Cancer, Head & Neck Cancer		Skin Cancer - Melanoma	Yes	Skin Cancer - Melanoma	Never Smoked			Male	Eastbourne	Lyndhurst	White - British	1954-10-16	2018-09-25	2018-10-24	Indoors	No	No													63
365	PEACE	CRUKP1842		yes	no	Skin Cancer - Melanoma	28	M	181.5	82.4	25.0135	Never	0									Yes	Skin Cancer - Melanoma	Never Smoked			Male	-9	-9	White - British	1988-02-23	2016-01-08	2017-01-19		-9	-9													27
366	PEACE	CRUKP2980		yes	no	Skin Cancer - Melanoma	65	M	173.3	91	30.3001	Never	0			Ipilimumab Nivolumab	Debrafenib Trametinib		Bowel Cancer	rdcrmh	Skin Cancer - Melanoma	No	Skin Cancer - Melanoma	Never Smoked			Male	Banstead, Surrey	Tadworth Surrey	White - British	1953-09-08	2017-04-20	2019-05-17	Indoors	No	No													63
368	PEACE	CRUKP7989		yes	no	Kidney Cancer	54	M	173.4	100.5	33.4247	Never	0		bone x2	Nivolumab	Sunitinib Axitinib		Other cancer not specified	rdcrmh	Kidney Cancer	Yes	Kidney Cancer	Never Smoked			Male	Carshalton	Sutton	White - British	1963-12-01	2017-09-11	2018-06-10	Indoors	Not known	No													53
369	PEACE	CRUKP6216		yes	no	Skin Cancer - Melanoma	78	F	156.8	47.6	19.3604	Never	0			Prembrolizumab Dabrafenib Trametinib			Breast Cancer	rdcrmh	Skin Cancer - Melanoma	Yes	Skin Cancer - Melanoma	Never Smoked			Female	Taunton	Woldingham	White - British	1939-06-25	2017-10-04	2017-11-16		No	No													78
370	PEACE	CRUKP1599		yes	no	Skin Cancer - Melanoma	75	F	163	71.6	26.9487	Former	12.5	Temozolomide	Right Breast Brain - Right frontal Brain Brain - Left occipital Brain - Right frontal	Ipilumumab Nivolumab Nivolumab		Letrozole 2.5mg daily	Lung Cancer, Brain Cancer		Skin Cancer - Melanoma	Yes	Skin Cancer - Melanoma	Ex-Smoker	25	10	Female	Ripley	Kew	White - British	1942-04-24	2017-10-10	2017-12-30	Indoors	No	No													75
371	PEACE	CRUKP2907		yes	no	Kidney Cancer	78	M	162	60.6	23.091	Former	Unknown									Yes	Kidney Cancer	Ex-Smoker	10		Male	-9	-9	White - British	1939-08-02	2017-11-21	2017-11-19		-9	-9													78
372	PEACE	CRUKP9301		yes	no	Kidney Cancer	52	M	171	87.9	30.0605	Never	0		6D/ Skull/ Brain Metastases	Sunitinib Nivolumab					Kidney Cancer	Yes	Kidney Cancer	Never Smoked			Male	BRISTOL	BRISTOL	White - British	1965-12-12	2018-05-11	2018-11-28		No	No													52
373	PEACE	CRUKP2378		yes	no	Skin Cancer - Melanoma	69	F	163	73.6	27.7015	Never	0		Left inguinal lymph node	Nivolimumab Ipilimumab Pembrolizumab			Bowel Cancer, Hodgkin's Lymphoma		Skin Cancer - Melanoma	Yes	Skin Cancer - Melanoma	Never Smoked			Female	Stanley, County Durham	London/HK/Lancashire/ Singapore	White - British	1948-09-08	2018-05-24	2018-07-07	Indoors	No	No													69
374	PEACE	CRUKP7864		yes	no	Skin Cancer - Melanoma	75	M				Never	0						Breast Cancer		Skin Cancer - Melanoma	Yes	Skin Cancer - Melanoma	Never Smoked			Male	Chester	London	White - British	1943-12-08	2018-10-02	2018-12-08	Indoors	No	No													74
375	PEACE	CRUKP2507		yes	no	Skin Cancer - Melanoma	66	M	167.3	61.4	21.937	Never	0		Thorax	Pembrolizumab Nivolumab and Relatimab			Prostate Cancer		Skin Cancer - Melanoma	Yes	Skin Cancer - Melanoma	Never Smoked			Male	Sale, Manchester	Tunbridge Wells	White - British	1953-07-12	2018-11-05	2019-08-14	Indoors	No	No													65
377	PEACE	CRUKP4650		yes	no	Eye Cancer - Intraocular Melanoma	80	M	160	59.8	23.3594	Former	40		Right Eye	Nivolumab			Prostate Cancer, Oesophageal Cancer, Stomach Cancer		Eye Cancer - Intraocular Melanoma	Yes	Eye Cancer - Intraocular Melanoma	Ex-Smoker	40	20	Male	LONDON	YES	White - British	1939-12-09	2018-11-16	2020-01-25	Both	No	No													78
379	PEACE	CRUKP3069		yes	no	Renal Cell (Kidney) Cancer	60	M	193	74.6	20.0274	Former	Unknown			Ipilimumab Nivolomab	Cabozanitinib				Renal Cell (Kidney) Cancer	Yes	Renal Cell (Kidney) Cancer	Recent Ex-Smoker	-9	20	Male	Nottingham	Nottingham	White - British	1958-06-01	2019-01-28	2019-02-23	Indoors	No	No													60
380	PEACE	CRUKP6098		yes	no	Kidney Cancer	74	M	193	126.6	33.9875	Never	0		left adrenal bed Right Scapula Right shoulder	Nivolumab	Sunitinib		Prostate Cancer, Bladder Cancer, Myelofibrosis	TRACERx Renal	Kidney Cancer	Yes	Kidney Cancer	Never Smoked			Male	Battersea , London	Wallington, Surrey	White - British	1944-06-23	2019-02-25	2019-05-15	Outdoors	Not known	No													74
381	PEACE	CRUKP2313		yes	no	Kidney Cancer	71	F	161	63.6	24.5361	Never	0		T8 to T10	Avelumab	Axitinib Cabozantinib		Breast Cancer, Somach Cancer		Kidney Cancer	Yes	Kidney Cancer	Never Smoked			Female	Colliers Wood, SW19	Mitcham, Surrey	White - British	1950-08-19	2019-03-01	2021-10-13		No	Yes		Don't know		No	Don't know		No		No		Don't know	No	68
383	PEACE	CRUKP5618		yes	no	Renal Cell (Kidney) Cancer	59	M	178	76.5	24.1447	Never	0				Nivolumab ipilimumab Cabozantanib		Ovarian Cancer		Renal Cell (Kidney) Cancer	Yes	Renal Cell (Kidney) Cancer	Never Smoked			Male	Chester-Le-street	London	White - British	1962-06-01	2019-07-23	2021-06-24	Indoors	No	Yes		Don't know		No	No		No		No		Don't know	No	57
384	PEACE	CRUKP6815		yes	no	Kidney Cancer	70	M	179.5	65.4	20.2978	Never	0		Left pleural mass	Nivolumab	Pazopanib Cabozantinib Axitinib Everolimus		Breast cancer	TRACERx Renal Patient	Kidney Cancer	Yes	Kidney Cancer	Never Smoked			Male	Chelmsford, Essex	London	White - British	1949-09-04	2019-07-23	2020-02-25		No	No													69
385	PEACE	CRUKP8949		yes	no	Skin Cancer - Melanoma	78	F	155.7	45.2	18.6449	Never	0			Nivolumab Ipilimumab					Skin Cancer - Melanoma	Yes	Skin Cancer - Melanoma	Never Smoked			Female	Unknown	Unknown	White - British	1941-08-27	2019-09-12	2019-09-12		Not known	-9													78
386	PEACE	CRUKP4807		yes	no	Skin Cancer - Melanoma	55	F	172	103.3	34.9175	Never	0						Breast, Pancreas, Brain Cancer	rdcrmh	Skin Cancer - Melanoma	No	Skin Cancer - Melanoma	Never Smoked			Female	London	London	White - British	1965-01-28	2019-09-18	2020-11-07	Indoors	Yes	No													54
387	PEACE	CRUKP1165		yes	no	Kidney Cancer	93	M	171	66.8	22.8446	Former	46		T11-L2 SPINE		PAZOPANIB TIVOZANIB				Kidney Cancer	Yes	Kidney Cancer	Ex-Smoker	46	20	Male	South Harrow	Lighwater	White - British	1926-10-21	2019-10-11	2019-10-30		No	Yes		Don't know		No	No		No		No		No	No	92
388	PEACE	CRUKP2339		yes	no	Kidney Cancer	52	F				Never	0							rdcrmh	Kidney Cancer	Yes	Kidney Cancer	Never Smoked			Female				1967-03-09	2019-11-20	2019-11-20																52
389	PEACE	CRUKP6623		yes	no	Skin Cancer	56	F				Former	Unknown				Dabrafenib Trametinib			TRACERx Melanoma	Skin Cancer	Yes	Skin Cancer	Ex-Smoker	-9		Female	-9	-9	-9	1963-11-01	2019-11-28	2019-12-02		-9	-9													56
390	PEACE	CRUKP1362		yes	yes	NSCLC_Squamous cell carcinoma	76	F	164.5	50.6	18.699	Former	Unknown	Carboplatin Gemcitabine Gemcitabine Paclitaxel Gemcitabine PALBOCICLIB HuMax-AXL-ADC SRA737 BOS172722		Nivolumab					NSCLC_Squamous cell carcinoma	Yes	Lung Cancer - Non-Small Cell Lung Cancer	Ex-Smoker	-9	2	Female	-9	High Wycombe	White - British	1943-09-23	2020-03-03	2020-02-29	Indoors	Not known	Yes		Don't know		Don't know	Don't know		Don't know		Don't know		Don't know	No	76
391	PEACE	CRUKP0031		yes	no	Renal Cell (Kidney) Cancer	50	F	168	77.2	27.3526	Never	0	Gemcitabine Cisplatin Carboplatin Gemcitabine Carboplatin Paclitaxel	Left Lung Bone 1 Site T5-T12 Left Femur Left Parietal Metastasis Left Abdomen Soft Tissue		Cabozantinib	First-in-human dose-escalation ASK DDU SCREENING PROTOCOL	Bowel Cancer, Leukeamia, Skin Cancer		Renal Cell (Kidney) Cancer	Yes	Renal Cell (Kidney) Cancer	Never Smoked			Female	Yorkshire	Horsham	White - British	1969-12-31	2020-03-06	2020-11-25	Indoors	No	No													50
392	PEACE	CRUKP7588		yes	no	Renal Cell (Kidney) Cancer	66	M				Never	0							rdcrmh	Renal Cell (Kidney) Cancer	Yes	Renal Cell (Kidney) Cancer	Never Smoked			Male				1954-01-18	2020-09-22	2020-09-18																66
393	PEACE	CRUKP9267		yes	yes	NSCLC_Adenocarcinoma	70	M	175	84.5	27.5918	Former	Unknown	Pemetrexed Cisplatin Carboplatin Gemcitabine		Pembrolizumab			Lung cancer, Breast cancer		NSCLC_Adenocarcinoma	Yes	Lung Cancer - Non-Small Cell Lung Cancer	Ex-Smoker	45	20	Male	London	London	White - British	1948-10-10	2018-05-15	2019-02-12	Indoors	No	Yes		Don't know		Don't know	Don't know		Don't know		Don't know		Don't know	No	69
394	PEACE	CRUKP7448		yes	no	Eye Cancer - Intraocular Melanoma	83	M	183	73	21.7982	Former	Unknown	Darcarbazine Cisplatin 40 mg per m2 VX-970 (ATRi) 210 mg per m2 23 cycles		Ipilimumab Nivolumab			Leukaemia - type not specified		Eye Cancer - Intraocular Melanoma	Yes	Eye Cancer - Intraocular Melanoma	Ex-Smoker	8	10	Male	Inverness	London	White - British	1935-08-27	2018-07-25	2018-11-26	Indoors	Not known	Yes	Somewhat serious	Yes		No	No		No		No	Somewhat serious	Yes	No	82
395	PEACE	CRUKP4685		yes	no	Intraocular Melanoma	53	F	176	77.1	24.8902	Never	0						Bowel Cancer		Intraocular Melanoma	Yes	Intraocular Melanoma	Never Smoked			Female	Leeds - Yorkshire	Milton Keynes	White - British	1965-05-04	2018-10-02	2018-11-24	Indoors	No	No													53
396	PEACE	CRUKP3201		yes	no	Prostate Cancer	65	M	173	51.1	17.0737	Former	Unknown	Oral Cyclophosphamide Docetaxel Cabazitaxel Epirubicin 5-Fluoracil	Prostrate			AZD8186 plus abiraterone			Prostate Cancer	Yes	Prostate Cancer	Ex-Smoker	20	20	Male	London	London	Black - Caribbean	1954-02-26	2019-06-21	2019-09-20	Indoors	No	No													65
397	PEACE	CRUKP2213		yes	yes	NSCLC_Adenocarcinoma	57	F	153	53.1	22.6836	Never	0	Carboplatin Pemetrexed	Whole brain	Pembrolizumab	Crizotinib Brigatinib		Ovarian cancer,		NSCLC_Adenocarcinoma	Yes	Lung Cancer - Non-Small Cell Lung Cancer	Never Smoked			Female	Calcatta	London	Asian - Bangladeshi	1962-08-03	2019-10-23	2019-12-04	Indoors	No	Yes		No		No	No		No	Somewhat serious	Yes	Somewhat serious	Yes	No	57
398	PEACE	CRUKP2112		yes	no	Eye Cancer - Intraocular Melanoma	67	M	180	83.1	25.6481	Never	0					IMCgp100-202	Liver Cancer		Eye Cancer - Intraocular Melanoma	Yes	Eye Cancer - Intraocular Melanoma	Never Smoked			Male	Southampton	Southampton	White - British	1952-06-25	2019-11-12	2020-01-13	Both	No	No													67
401	PEACE	CRUKP0646		yes	no	Kidney Cancer	49	F				Never	0							rdcrmh	Kidney Cancer	Yes	Kidney Cancer	Never Smoked			Female				1971-11-03	2021-10-15	2021-10-12																49
402	PEACE	CRUKP3814		yes	no	Prostate Cancer	82	M	182	80.8	24.3932	Never	0	Docetaxel Cabazitaxel	T1-T2 spine			Abiraterone			Prostate Cancer	Yes	Prostate Cancer	Never Smoked			Male	Cumbria	Rugby	White - British	1938-10-04	2020-02-26	2021-01-02	Indoors	No	No													81
403	PEACE	CRUKP4256		yes	yes	NSCLC_Adenocarcinoma	69	F	171	90.6	30.9839	Former	Unknown			Atezolizumab	Carboplatin Vinorelbine		Prostate Cancer, Head & Neck Cancer		NSCLC_Adenocarcinoma	Yes	Lung Cancer - Non-Small Cell Lung Cancer	Ex-Smoker	30	20	Female	Manchester	Manchester	White - British	1950-12-31	2019-05-31	2020-11-08	Indoors	No	No													68
404	PEACE	CRUKP7216		yes	yes	NSCLC_Adenocarcinoma	84	F	151	60	26.3146	Former	Unknown		Right Lung Right Chest Wall - Axilla Right Chest Wall - Axilla re-treatment	Atezolizumab					NSCLC_Adenocarcinoma	Yes	Lung Cancer - Non-Small Cell Lung Cancer	Ex-Smoker	50	15	Female	Austria	Manchester	White - other (please specify)	1936-10-17	2021-02-08	2021-02-15		Not known	Yes		Don't know		Don't know	Don't know		Don't know		Don't know	Not very serious	Yes	No	84
405	PEACE	CRUKP2758		yes	no	Skin Cancer - Melanoma	59	F				Former	Unknown			Nivolumab BMS-986016					Skin Cancer - Melanoma	Yes	Skin Cancer - Melanoma	Ex-Smoker	5	15	Female	London	London	White - British	1961-12-26	2018-12-17	2021-10-10	Indoors	No	No													56
406	PEACE	CRUKP5699		yes	no	Paraganglioma	55	M				Former	75							rdcrmh	Paraganglioma	Yes	Paraganglioma	Ex-Smoker	10	7	Male				1966-07-08	2021-10-11	2021-10-09																55
407	PEACE	CRUKP9911		yes	no	Eye Cancer - Intraocular Melanoma	71	F	158	66.3	26.5582	Former	Unknown								Eye Cancer - Intraocular Melanoma	No	Eye Cancer - Intraocular Melanoma	Ex-Smoker	50	25	Female	Surrey	Hertfordshire	White - British	1949-08-13	2020-01-10	2021-03-22	Indoors	Not known	No													70
408	PEACE	CRUKP0279		yes	yes	NSCLC_Other	58	M	183	86	25.6801	Former	Unknown	Carboplatin and Gemcitabine Guadecitabine Vinorelbine	Brain metastases Left upper lobe - lung Mediastinum and left hilum Brain metastates	Pembrolizumab			head and neck cancer, oesophageal cancer, stomach cancer, melanoma		NSCLC_Other	Yes	Lung Cancer - Non-Small Cell Lung Cancer	Ex-Smoker	35	10	Male	Woking	London	White - British	1963-04-22	2019-06-14	2021-08-16	Indoors	Not known	No													56
409	PEACE	CRUKP9617		yes	no	Breast Cancer	45	F	175	72	23.5102	Never	0	FEC/T Capecitabine	Right chest wall			G1T38 plus Fulvestrant; Tamoxifen Letrozole Exemestane Tamoxifen Zoladex Denosumab Letrozole	Breast Cancer		Skin Cancer - Melanoma	Yes	Breast Cancer	Never Smoked			Female	England	England	White - British	1975-04-14	2019-10-07	2021-03-17		No	No													44
410	PEACE	CRUKP5339		yes	no	Prostate Cancer	55	M	175	81	26.449	Never	0	Degarelix Docetaxel	Prostate			Enzalutamide Zoladex	Bowel cancer, Bladder cancer		Prostate Cancer	Yes	Prostate Cancer	Never Smoked			Male	Basingstoke	London	White - British	1966-08-24	2021-07-05	2021-09-03	Indoors	Not known	No													54
508	PEACE	CRUKP2225		yes	no	melanoma	80	M				Former	61.25	TEMOZOLOMIDE	Bone all site L3-L5 vertebrae Thorax	Nivolumab	IXAZOMIB		Prostate Cancer	TRACERx Melanoma	Skin Cancer - Melanoma	Yes	Skin Cancer - Melanoma	Ex-Smoker	35	35	Male	Birr, Ireland	Ealing, London	White - British	1939-01-22	2019-10-10	2019-10-19	Indoors	Not known	No													80
509	PEACE	CRUKP5985		yes	no	melanoma	57	F	187	128.4	36.7182	Former	20	Temozodomide BIBW Trial Vincristine Lomustine Procarbazine hydrochloride Temozolomide	Brain		Nivolumab Ipilumumab		Bone cancer		Skin Cancer - Melanoma		Skin Cancer - Melanoma	Current Smoker	40	10	Female	Oxted	Oxted	White - British	1963-11-06	2021-01-20	2021-05-07	Both	No	No													57
[truncated: 1 more columns]

## Sheet: TRACERx
sample	cohort	lab_id	site	anyCancer	lungCancer	type_and_stage	age	sex	race	smoking_history	smoking_status	pack_years	AdultTown	ChildTown	REGSex	DEMEthnicity	DEMEthnicOthr	DEMHeight	DEMWeight	DEMSmkStatus.R_TRACERx_BaselineForm	DEMSmkType	DEMSmkPerDay	DEMSmkYrs	Pack Year Estimate	CigarPD	CigarPW	CurrentlySmoke	HomeSmoke	PipesPD	PipesPW	SmokeAgeStrt	SmokedPastAmt	SmokedPastStrt	SmokedPastStop	Estimated Years Stopped Smoking	TypeOfWork	Asbestos	parenchyma_carbon.1	Histology	Comments
844	TRACERx	CRUK0063		yes	yes	lung	64	M	White- British	Current	Current	92	Bishops Stortford - Herts	Hornchurch - Essex	Male	White- British		187.9	75	Current Smoker	Cigarettes	40	46	92			Not at all	Less than monthly				Daily	18	64	0	Manual work	No	Yes
845	TRACERx	CRUK0085		yes	yes	lung	77	M	White- British	Current	Current	50.25	Wigan	St Helens	Male	White- British		165	85	Current Smoker	Cigarettes	15	67	50.25			Daily	Daily								Heavy manual work	Dont know	No
846	TRACERx	CRUK0042		yes	yes	lung	67	M	White- British	Never	Never	0	Birmingham	Birmingham	Male	White- British		194	103	Never Smoked							Not at all					Not at all				Sedentary occupation	Dont know	Yes
847	TRACERx	CRUK0183		yes	yes	lung	55	F		Current	Current	84			Female			154.9	70.5	Current Smoker	Cigarettes	40	42	84														Yes	No tumour	Lots of pigmented macrophages
848	TRACERx	CRUK0010		yes	yes	lung	67	M	White- British	Never	Never	0	Kilmarnock	Kilmarnock	Male	White- British		183	96.2	Never Smoked							Not at all	Never				Not at all				Manual work	No	Yes
849	TRACERx	CRUK0118		yes	yes	lung	68	F		Current	Current	40			Female			159	72.9	Current Smoker	Cigarettes	20	40	40														No
850	TRACERx	CRUK0033		yes	yes	lung	68	M	White- British	Never	Never	0	Manchester	Manchester	Male	White- British		183	93.6	Never Smoked							Not at all	Never				Not at all				Standing occupation	Dont know	Yes
851	TRACERx	CRUK0202		yes	yes	lung	68	F		Current	Current	18.8			Female			161	45.9	Current Smoker	Cigarettes	8	47	18.8														No
852	TRACERx	CRUK0019		yes	yes	lung	54	F	White- British	Never	Never	0	Epping, Essex	London	Female	White- British		161.5	76.5	Never Smoked							Not at all	Never				Not at all				Standing occupation	No	No
853	TRACERx	CRUK0014		yes	yes	lung	66	M	White- British	Never	Never	0	Fraserburgh	Gardenstown	Male	White- British		175	86.6	Never Smoked							Not at all	Never				Not at all				Manual work	No	Yes
854	TRACERx	CRUK0279		yes	yes	lung	80	F	White- British	Never	Never	0	Fraserburgh		Female	White- British		147	53.8	Never Smoked							Not at all	Never				Not at all				Manual work	No	Yes
855	TRACERx	CRUK0297		yes	yes	lung	85	M	White- Irish	Never	Never	0	Birmingham	London/Puford	Male	White- Irish		173	70	Never Smoked							Not at all	Never				Not at all					No	Yes
856	TRACERx	CRUK0247		yes	yes	lung	64	F	White- British	Current	Current	48	Chigwell	Debden Essex	Female	White- British		155	45	Current Smoker	Cigarettes	20	48	48			Daily	Never			15	Daily	15			Sedentary occupation	Yes	No	No tumour	AAH
857	TRACERx	CRUK0331		yes	yes	lung	53	M	White- British	Never	Never	0	Nelson	Atherton	Male	White- British		177.6	89.1	Never Smoked							Not at all									Heavy manual work	Dont know	Yes	No tumour
858	TRACERx	CRUK0305		yes	yes	lung	57	F	White- British	Never	Never	0	South Godstone, Surrey	Gravesend, Kent	Female	White- British		164	75	Never Smoked							Not at all	Never				Not at all				Sedentary occupation	No	No
859	TRACERx	CRUK0385		yes	yes	lung	56	F	White- British	Current	Current	19	Plumstead	Chelsfield, Kent	Female	White- British		171	68.2	Current Smoker	Cigarettes	10	38	19			Not at all	Weekly				Daily	18	56	0	Manual work	Dont know	No
860	TRACERx	CRUK0455		yes	yes	lung	59	F	White- British	Current	Current	40	Birmingham	Birmingham	Female	White- British		155	51	Current Smoker	Cigarettes	20	40	40			Not at all	Never				Daily	17			Sedentary occupation	No	Yes	No tumour
861	TRACERx	CRUK0492		yes	yes	lung	58	F	Indian	Never	Never	0	Birmingham	Lusaila Zambia	Female	Indian		155	58	Never Smoked							Not at all	Never				Not at all				Sedentary occupation	No	Yes
862	TRACERx	CRUK0480		yes	yes	lung	40	F	White- British	Never	Never	0	Glossop	Glossop	Female	White- British		147	47	Never Smoked							Not at all	Never				Not at all				Manual work	Dont know	Yes	No tumour	Mild emphysema
863	TRACERx	CRUK0472		yes	yes	lung	67	F	White- British	Current	Current	50	Aberdeen	Aberdeen	Female	White- British		167	74.9	Current Smoker	Cigarettes	20	50	50			Daily	Never			18					Standing occupation	Dont know	No	No tumour
864	TRACERx	CRUK0450		yes	yes	lung	59	F	White- British	Current	Current	33.75	Birmingham	Birmingham	Female	White- British		164	50	Current Smoker	Cigarettes	15	45	33.75			Not at all	Daily				Daily	13	60	-1	Standing occupation	Dont know	Yes	No tumour	Reactive hyperplasia
865	TRACERx	CRUK0446		yes	yes	lung	38	M	White- British	Current	Current	38	Manchester	Durban	Male	White- British		175	65	Current Smoker	Cigarettes	20	38	38			Daily	Never			11					Manual work	Dont know	Yes	No tumour	Pigment Laden macropahges
866	TRACERx	CRUK0537		yes	yes	lung	57	F	White- Irish	Current	Current	57	Manchester	Manchester	Female	White- Irish		156	56.2	Current Smoker	Cigarettes	30	38	57			Daily	Daily			19					Standing occupation	Dont know	No
867	TRACERx	CRUK0524		yes	yes	lung	65	M	White- British	Never	Never	0	Birmingham	Birmingham	Male	White- British		176	102	Never Smoked							Not at all	Never				Not at all				Manual work	No	Yes
868	TRACERx	CRUK0629		yes	yes	lung	67	F	White- British	Never	Never	0	Evesham	Evesham	Female	White- British		167	54	Never Smoked							Not at all	Never				Not at all				Sedentary occupation	Dont know	Yes	No tumour	Reactive hyperplasia
869	TRACERx	CRUK0688		yes	yes	lung	68	M	White- British	Current	Current	39	Sunbury-on-Thames	Hendon	Male	White- British		180	92	Current Smoker	Cigarettes	15	52	39			Not at all	Never				Daily	16	68	0	Sedentary occupation	No	Yes	No tumour
870	TRACERx	CRUK0650		yes	yes	lung	56	F	White- British	Current	Current	40	Birmingham	Birmingham	Female	White- British		171	51	Current Smoker	Cigarettes	20	40	40			Not at all	Daily				Daily	16	56	0	Standing occupation	Dont know	Yes	No tumour	Mild emphysema
871	TRACERx	CRUK0752		yes	yes	lung	60	F	White- British	Current	Current	45	Glasgow	Glasgow	Female	White- British		159	65.2	Current Smoker	Cigarettes	20	45	45			Daily	Daily			16					Sedentary occupation	Dont know	Yes	No tumour	Mild emphysema
872	TRACERx	CRUK0714		yes	yes	lung	62	M	White- British	Current	Current	34.3	Birmingham/Redditch	Birmingham	Male	White- British		168	71	Current Smoker	Cigarettes	14	49	34.3			Less than daily	Never				Daily	13	62	0	Manual work	No	Yes	No tumour
873	TRACERx	CRUK0771		yes	yes	lung	38	M	White and Black Caribbean	Current	Current	9.2	Birmingham	Birmingham	Male	White and Black Caribbean		182	87	Current Smoker	Cigarettes	8	23	9.2			Daily	Daily			14	Daily				Standing occupation	Dont know	Yes	No tumour	Intra-alveolar Haemorrhage
874	TRACERx	CRUK0909		yes	yes	lung	49	M	White- British	Current	Current	29	Witham Essex	Forest Gate/ Walthamstow (East London)	Male	White- British		179	75	Current Smoker	Cigarettes	20	29	29			Daily	Daily			19					Manual work	Dont know	No
875	TRACERx	CRUK0968		yes	yes	lung	79	F	White- British	Never	Never	0	EDGWARE	DEVON AND EAST LONDON	Female	White- British		146	49	Never Smoked							Not at all	Never				Not at all				Standing occupation	Dont know	Yes
876	TRACERx	CRUK0987		yes	yes	lung	76	M	White- British	Current	Current	58	Birmingham	Balsall Heath	Male	White- British		167	56.6	Current Smoker	Cigarettes	20	58	58			Not at all	Never				Daily	18	76	0	Manual work	No	Yes	No tumour
877	TRACERx	CRUK1044		yes	yes	lung	69	M	White- British	Current	Current	121.5	Glasgow	Glasgow	Male	White- British		152	47	Recent Ex-Smoker	Cigarettes	45	54	121.5			Not at all	Never				Daily	15	69	0	Heavy manual work	Yes	Yes	No tumour.	Fibroblastic foci and accumulation of pigmented intra-alveolar macropahges
878	TRACERx	CRUK1083		yes	yes	lung	60	F	White- British	Current	Current	34.5	Wythenshawe	Wythenshawe	Female	White- British		152	67.8	Current Smoker	Cigarettes	15	46	34.5			Daily	Never			15					Standing occupation	No	Yes	No tumour
879	TRACERx	CRUK1156		yes	yes	lung	49	M	White- British	Current	Current	35	Worcester	Surrey	Male	White- British		175	84	Current Smoker	Cigarettes	20	35	35			Daily	Daily			14					Manual work	No	No	No tumour	Mild emphysema
880	TRACERx	CRUK1196		yes	yes	lung	83	F	White- British	Never	Never	0	Ilford	Ilford	Female	White- British		162	60	Never Smoked							Not at all	Never				Not at all				Standing occupation	Dont know	No
881	TRACERx	CRUK1186		yes	yes	lung	69	F	White- British	Current	Current	24.5	Kettering	Irthlingborough	Female	White- British		161	52.7	Current Smoker	Cigarettes	10	49	24.5			Not at all	Never				Daily	17	69	0	Standing occupation	Yes	Yes	No tumour
882	TRACERx	CRUK1162		yes	yes	lung	64	F	White- British	Never	Never	0	Wigan	Wigan	Female	White- British		158.5	96.2	Never Smoked							Not at all	Never				Not at all				Standing occupation	Yes	Yes	No tumour
883	TRACERx	CRUK1248		yes	yes	lung	66	F		Never	Never	0			Female			170	57	Never Smoked																		Yes
884	TRACERx	CRUK1290		yes	yes	lung	64	M	White- British	Current	Current	38.25	Glasgow	Wishaw	Male	White- British		174	96.9	Current Smoker	Cigarettes	15	51	38.25			Not at all	Never				Daily	12	64	0	Sedentary occupation	No	Yes	No tumour
885	TRACERx	CRUK1265		yes	yes	lung	56	M	White- British	Current	Current	30	Glasgow	Glasgow	Male	White- British		172	77.1	Current Smoker	Cigarettes	20	30	30			Not at all	Never				Daily	21	55	1	Manual work	Yes	Yes	No tumour	Lots of pigmented macrophages
886	TRACERx	CRUK1299		yes	yes	lung	52	M	African	Never	Never	0	Addes Ababa	Harar (Ethiopia)	Male	African		166	64.5	Never Smoked							Not at all	Never				Not at all					Dont know	Yes
887	TRACERx	CRUK1320		yes	yes	lung	74	F	Indian	Never	Never	0	London	Bombay India	Female	Indian		153	79.1	Never Smoked							Not at all	Never				Not at all				Sedentary occupation	No	Yes	No tumour	Mild emphysema
888	TRACERx	CRUK1345		yes	yes	lung	44	F	Asian- Other	Never	Never	0	Launion	San Juan	Female	Asian- Other	Philippines	161	76	Never Smoked							Not at all	Never				Not at all				Manual work	No	Yes	No tumour
889	TRACERx	CRUK1351		yes	yes	lung	59	F		Current	Current	40			Female			161	64	Current Smoker	Cigarettes	20	40	40														Yes	No tumour	Mild emphysema
890	TRACERx	CRUK1397		yes	yes	lung	75	F	White- British	Never	Never	0	Horwich	Horwich	Female	White- British		158	56.9	Never Smoked							Not at all	Never				Not at all				Standing occupation	No	Yes	No tumour
891	TRACERx	CRUK1325		yes	yes	lung	64	F	Caribbean	Never	Never	0	Manchester	Manchester	Female	Caribbean		161	95.4	Never Smoked							Not at all	Never				Not at all				Manual work	No	Yes	No tumour
892	TRACERx	CRUK0034		yes	yes	lung	67	F	White- Irish	Ex-Smoker	Former	35	London	Dublin	Female	White- Irish		157.3	99.8	Ex-Smoker	Cigarettes	20	35	35			Not at all	Never				Daily	15	48	19	Manual work	Yes	No
893	TRACERx	CRUK0071		yes	yes	lung	66	M	White- British	Ex-Smoker	Former	80	Manchester	Teeside	Male	White- British		170	82	Ex-Smoker	Cigarettes	40	40	80			Not at all	Daily				Daily	24	64	2	Heavy manual work	No	No
894	TRACERx	CRUK0091		yes	yes	lung	49	F	White- British	Recent Ex-Smoker	Former	34	London	London	Female	White- British		155	66.1	Recent Ex-Smoker	Cigarettes	20	34	34			Not at all	Never				Daily	16	50	-1	Sedentary occupation	Dont know	No
895	TRACERx	CRUK0051		yes	yes	lung	75	M	White- British	Ex-Smoker	Former	73.5	Leicester	Leicester	Male	White- British		164	73.6	Ex-Smoker	Cigarettes	30	49	73.5			Not at all	Never				Daily	16	65	10	Manual work	Dont know	Yes	No tumour
896	TRACERx	CRUK0095		yes	yes	lung	58	F	White- British	Recent Ex-Smoker	Former	19.8	Birmingham	Birmingham	Female	White- British		155;NA	76;NA	Recent Ex-Smoker	Cigarettes;	12	33	19.8			Not at all	Never				Daily	21	59	-1	Heavy manual work	No	No
897	TRACERx	CRUK0089		yes	yes	lung	66	M	White- British	Recent Ex-Smoker	Former	15	Melton Mowbray	Melton Mowbray	Male	White- British		173	66.2	Recent Ex-Smoker	Cigarettes	15	20	15			Less than daily	Never				Daily					Dont know	No	no tumour
898	TRACERx	CRUK0096		yes	yes	lung	73	F	White- British	Recent Ex-Smoker	Former	53	Leicester		Female	White- British		158	58	Recent Ex-Smoker	Cigarettes	20	53	53													Dont know	Yes	No tumour	interstitial inflammation
899	TRACERx	CRUK0038		yes	yes	lung	81	F	White- British	Ex-Smoker	Former	30	Aberdeen	Aberdeenshire in the country	Female	White- British		157.4	75.8	Ex-Smoker	Cigarettes	20	30	30			Not at all	Never				Daily	15	47	34	Sedentary occupation	Dont know	Yes	No tumour	Reactive hyperplasia
900	TRACERx	CRUK0083		yes	yes	lung	71	M	White- British	Ex-Smoker	Former	50	Birmingham	Birmingham	Male	White- British		172;NA	79;NA	Ex-Smoker	Cigarettes;	20	50	50			Not at all	Never				Daily	16	65	6	Standing occupation	Dont know	Yes	No tumour	Sub pleural sample
901	TRACERx	CRUK0162		yes	yes	lung	59	M	White- British	Ex-Smoker	Former	122.5	Glossop	West Bromwhich	Male	White- British		174	62	Ex-Smoker	Cigarettes	50	49	122.5			Not at all	Never				Daily	11	59	0	Manual work	Dont know	Yes	No tumour.	Lots of pigmented macrophages
902	TRACERx	CRUK0009		yes	yes	lung	55	M	White- British	Recent Ex-Smoker	Former	10.25	Wigan	Wigan	Male	White- British		175;NA	71;NA	Recent Ex-Smoker	Cigarettes;	5	41	10.25			Not at all	Daily				Daily	14	55	0	Heavy manual work	Dont know	No
903	TRACERx	CRUK0270		yes	yes	lung	67	M	White- British	Ex-Smoker	Former	162	Sterndale Moor, Derbyshire	Chapel en le frith	Male	White- British		168	83.1	Ex-Smoker	Cigarettes	60	54	162			Not at all	Never				Daily	12	66	1	Manual work	Dont know	No
904	TRACERx	CRUK0048		yes	yes	lung	75	F	White- British	Ex-Smoker	Former	56	Epping	Epping	Female	White- British		155	82.4	Ex-Smoker	Cigarettes	20	56	56			Not at all	Never				Daily	17	73	2	Manual work	Yes	No
905	TRACERx	CRUK0223		yes	yes	lung	62	M	White- British	Ex-Smoker	Former	40	Aberdeen	Forces Child	Male	White- British		173	86.3	Ex-Smoker	Cigarettes	40	20	40			Not at all	Never				Daily	20	40	22	Sedentary occupation	No	Yes	No tumour	Lots of pigmented macrophages
906	TRACERx	CRUK0381		yes	yes	lung	52	F	White- British	Ex-Smoker	Former	30	Erdington	Erdington	Female	White- British		164	62.4	Ex-Smoker	Cigarettes	20	30	30			Not at all	Never				Daily	18	47	5	Manual work	No	Yes	No tumour.	Subpleural sample. Fibrosis and lymphoid aggregate.
907	TRACERx	CRUK0333		yes	yes	lung	63	F	White- British	Recent Ex-Smoker	Former	29.9	Bishops Stortford	Hinckley	Female	White- British		162	49	Recent Ex-Smoker	Cigarettes	13	46	29.9			Not at all	Never				Daily	17	63	0	Manual work	Yes	No
908	TRACERx	CRUK0368		yes	yes	lung	81	M	White- British	Ex-Smoker	Former	35	London	London	Male	White- British		164	69.2	Ex-Smoker	Cigarettes	20	35	35			Not at all	Never				Daily	16	50	31	Sedentary occupation	No	Yes	No tumour
909	TRACERx	CRUK0382		yes	yes	lung	91	M	White- Irish	Ex-Smoker	Former	30	London	Charliestown, Mayo Ireland	Male	White- Irish		172	99.3	Ex-Smoker	Cigarettes	15	40	30			Not at all	Never		3		Daily				Manual work	Dont know	Yes	No tumour
910	TRACERx	CRUK0350		yes	yes	lung	70	M	White- British	Recent Ex-Smoker	Former	27.5	Northwich	Manchester	Male	White- British		156	54	Recent Ex-Smoker	Cigarettes	10	55	27.5			Not at all	Never				Daily	15	70	0	Sedentary occupation	Dont know	No	No tumour
911	TRACERx	CRUK0497		yes	yes	lung	70	M	White- British	Ex-Smoker	Former	50	Aberdeen	Aberdeen	Male	White- British		160	79.6	Ex-Smoker	Cigarettes	20	50	50				Never				Daily	15	64	6	Sedentary occupation	Dont know	Yes	No tumour	very little airspace - mostly fibrosis ?suitable
912	TRACERx	CRUK0413		yes	yes	lung	84	F	White- British	Ex-Smoker	Former	27	Astley	Salford 5	Female	White- British		169.5	75.6	Ex-Smoker	Cigarettes	20	27	27			Not at all	Never				Daily	17	44	40	Standing occupation	No	Yes
913	TRACERx	CRUK0431		yes	yes	lung	62	M	White- British	Ex-Smoker	Former	20	Crewe	Crewe	Male	White- British		175	98	Ex-Smoker	Cigarettes	20	20	20				Never				Daily	15	35	27	Standing occupation	No	Yes	No tumour.	Lots of smooth muscle hyperplasia
914	TRACERx	CRUK0402		yes	yes	lung	79	M	White- British	Ex-Smoker	Former	75	Manchester	Manchester- Chorlton/Whythenshawe	Male	White- British		182	85.6	Ex-Smoker	Cigarettes	25	60	75				Never				Daily	17	74	5	Standing occupation	No	Yes	No tumour.	Mild emphysema
915	TRACERx	CRUK0403		yes	yes	lung	89	M	White- British	Ex-Smoker	Former	144	Southampton	Southampton	Male	White- British		173	75.5	Ex-Smoker	Cigarettes	60	48	144		2	Not at all	Never		1		Daily	12	60	29	Heavy manual work	Yes	Yes	No tumour.	Reactive hyperplasia and fibrosis
916	TRACERx	CRUK0590		yes	yes	lung	73	M	White- British	Ex-Smoker	Former	49.5	Birmingham	Birmingham	Male	White- British		173	73	Ex-Smoker	Cigarettes	30	33	49.5	0		Not at all	Never	0			Daily	24	52	21	Heavy manual work	Yes	Yes	No tumour
917	TRACERx	CRUK0549		yes	yes	lung	64	F	White- British	Ex-Smoker	Former	49	Bolton	Bolton	Female	White- British		157	68.6	Ex-Smoker	Cigarettes	20	49	49			Not at all	Never				Daily	15	64	0	Manual work	No	No
918	TRACERx	CRUK0570		yes	yes	lung	79	F	White- British	Ex-Smoker	Former	40.5	Oldbury	Smethwick	Female	White- British		157	65.8	Ex-Smoker	Cigarettes	15	54	40.5			Not at all	Never				Daily	15	69	10	Standing occupation	No	Yes
919	TRACERx	CRUK0512		yes	yes	lung	74	F	White- British	Ex-Smoker	Former	33	In the country	South Africa	Female	White- British		170	64.2	Ex-Smoker	Cigarettes	30	22	33			Not at all	Never				Daily	18	40	34	Sedentary occupation	Yes	Yes	No tumour	Reactive hyperplasia
920	TRACERx	CRUK0543		yes	yes	lung	70	F	White- British	Ex-Smoker	Former	20	Walsall	Walsall	Female	White- British		157	63.4	Ex-Smoker	Cigarettes	10	40	20			Not at all	Daily				Daily	19	50	20	Manual work	Yes	Yes	No tumour
921	TRACERx	CRUK0511		yes	yes	lung	70	F	White- British	Ex-Smoker	Former	30	London	London	Female	White- British		166	62	Ex-Smoker	Cigarettes	25	24	30			Not at all	Never				Daily	15	39	31	Sedentary occupation	No	Yes
922	TRACERx	CRUK0674		yes	yes	lung	77	M	White- British	Ex-Smoker	Former	132	Birmingham	Birmingham	Male	White- British		176	100	Ex-Smoker	Cigarettes	40	66	132			Not at all	Never				Daily	10	76	1	Heavy manual work	Dont know	Yes	No tumour.	Extensive fibrosis and smooth muscle hyperplasia. Not sure there is a lot of normal lung parenchyma
923	TRACERx	CRUK0607		yes	yes	lung	64	F	White- British	Ex-Smoker	Former	40	Aberdeen	Aberdeen	Female	White- British		162	82.2	Ex-Smoker	Cigarettes	20	40	40			Not at all	Never				Daily	18	54	10	Standing occupation	Dont know	No	No tumour
924	TRACERx	CRUK0617		yes	yes	lung	72	F	White- British	Ex-Smoker	Former	64	Burntwood, Litchfield , Staffs	Birmingham (Great Bar)	Female	White- British		159	94.8	Ex-Smoker	Cigarettes	40	32	64			Not at all	Never				Daily	18	50	22	Standing occupation	No	No
925	TRACERx	CRUK0616		yes	yes	lung	84	M	White- British	Ex-Smoker	Former	30	Birmingham Whittington Village Lichfield	Birmingham	Male	White- British		180	113.2	Ex-Smoker	Cigarettes	20	30	30			Not at all	Never				Daily	15	41	43	Manual work	Dont know	Yes	No tumour.
926	TRACERx	CRUK0679		yes	yes	lung	70	F	White- British	Ex-Smoker	Former	30	Timperley	Altrincham	Female	White- British		154	81.2	Ex-Smoker	Cigarettes	15	40	30			Not at all	Never				Daily	18	48	22	Sedentary occupation	Yes	No
927	TRACERx	CRUK0698		yes	yes	lung	73	F	White- British	Ex-Smoker	Former	47	Birmingham	Sutton coldfield	Female	White- British		155	77.6	Ex-Smoker	Cigarettes	20	47	47			Not at all	Never				Daily	16	63	10	Manual work	No	Yes	No tumour	Mild emphysema
928	TRACERx	CRUK0707		yes	yes	lung	75	M	White- British	Ex-Smoker	Former	54	Salford	Salford	Male	White- British		180	73	Ex-Smoker	Cigarettes	30	36	54			Not at all	Never				Daily	17	53	22	Manual work	Dont know	Yes
930	TRACERx	CRUK0804		yes	yes	lung	68	M	White- British	Ex-Smoker	Former	29.25	Sutton Coldfield	Sutton Coldfield	Male	White- British		178	98	Ex-Smoker	Cigarettes	15	39	29.25	3		Not at all	Never				Daily	15	58	10	Manual work	Dont know	Yes	No tumour
931	TRACERx	CRUK0871		yes	yes	lung	68	F	White- British	Ex-Smoker	Former	20	SUTTON COLDFIELD	SUTTON COLDFIELD	Female	White- British		169	69	Ex-Smoker	Cigarettes	10	40	20			Not at all	Never				Daily	21	61	7	Sedentary occupation	Dont know	No
932	TRACERx	CRUK0808		yes	yes	lung	65	M	White- British	Ex-Smoker	Former	42	Sheffield	Sheffield	Male	White- British		177	83.5	Ex-Smoker	Cigarettes	20	42	42			Not at all	Never				Daily	18	60	5	Sedentary occupation	Dont know	Yes	No tumour
933	TRACERx	CRUK0929		yes	yes	lung	80	F	White- British	Ex-Smoker	Former	45	London	Oldham Lancs	Female	White- British		156	63	Ex-Smoker	Cigarettes	30	30	45			Not at all	Never				Daily	25	60	20	Standing occupation	No	Yes	No tumour	Mild emphysema
934	TRACERx	CRUK0972		yes	yes	lung	60	M	Pakistani	Recent Ex-Smoker	Former	40	Sheffield	Sheffield	Male	Pakistani		176	81.2	Recent Ex-Smoker	Cigarettes	20	40	40			Not at all	Never				Daily	20	60	0	Heavy manual work	Dont know	Yes	No tumour
935	TRACERx	CRUK0960		yes	yes	lung	78	F	White- British	Ex-Smoker	Former	42	London	London	Female	White- British		157	64.5	Ex-Smoker	Cigarettes	15	56	42			Not at all	Never				Daily	17	73	5	Standing occupation	Dont know	Yes	No tumour
936	TRACERx	CRUK0934		yes	yes	lung	75	F	White- British	Ex-Smoker	Former	55	London	Wales	Female	White- British		149	76.2	Ex-Smoker	Cigarettes	20	55	55			Not at all	Never				Daily	15	70	5	Standing occupation	No	Yes	No tumour.	Sub pleural sample
937	TRACERx	CRUK0979		yes	yes	lung	77	M	Indian	Recent Ex-Smoker	Former	30.5	London, UK	Mombasa, Kenya	Male	Indian		173	67.4	Recent Ex-Smoker	Cigarettes	10	61	30.5			Not at all	Never				Daily	16	77	0	Standing occupation	No	Yes	No tumour
938	TRACERx	CRUK0993		yes	yes	lung	77	F	White- British	Ex-Smoker	Former	35	Aberdeen	Clarkston Renfrewshire	Female	White- British		166.5	81.5	Ex-Smoker	Cigarettes	20	35	35			Not at all	Never				Daily	15	50	27	Manual work	No	Yes	No tumour
939	TRACERx	CRUK1062		yes	yes	lung	80	F	White- British	Ex-Smoker	Former	33	Wotton-under Edge - Gloucestershire	Birmingham	Female	White- British		170	108.6	Ex-Smoker	Cigarettes	20	33	33			Not at all	Never				Daily	14	47	33	Sedentary occupation	Dont know	Yes	No tumour	Mild emphysema

## Sheet: BDREcontralateral
sample	lab_id	Height (In	Weight (lbs)	BMI	Prior CA Tx ( chemotherapy, immunotherapy, targeted therapy, or hormone therapy)	collection_year	site	anyCancer	lungCancer	type_and_stage	age	sex	race	smoking_history	smoking_status	pack_years	quit_year	collection_year	yearsSinceQuit	AgeAtCessation	cohort
64	219583	72	233	31.6002	Bladder: Resection (2013)	2019	LUL	yes	yes	squamous cell, stage IA	74	M	white	FORMER; QUIT AGE 50	Former	125	1995	2019	24	50	BDRE
66	220357	72	172	23.3272	None	2019	LUL	yes	yes	adeno, stage IV	64	M	WHITE	CURRENT	Current	50		2019			BDRE
68	220397	70	176	25.2531	None	2019	LLL	yes	yes	adeno, stage IB	78	M	WHITE	NEVER SMOKER	Never	0		2019			BDRE
70	220426	71	168	23.431	None	2019	LUL	yes	yes	Adeno, pT2bN0MX IIA	72	M	WHITE	FORMER; QUIT 60YO	Former	42	2007	2019	12	60	BDRE
72	220511	68	164	24.9359	None	2020	RML	yes	yes	Adeno carcinoma, pT1bN0M0	64	M	WHITE	CURRENT	Current	35		2020			BDRE
74	220392	74	200	25.6782	None	2019	LUL	no	no	none	71	M	WHITE	FORMER; QUIT 1977	Former	8	1977	2019	42	29	BDRE
76	220424	76	226	27.5093	None	2019	LLL	no	no	none	78	M	WHITE	CURRENT	Current	64		2019			BDRE
78	216194	72	269	36.4826	None	2019	RUL	no	no	none	78	M	WHITE	NEVER SMOKER	Never	0		2019			BDRE
80	220436	69	249	36.7705	Kidney: Nephrectomy, radiation	2019	LUL	no	no	none	68	M	BLACK	FORMER; QUIT 1993	Former	20	1993	2019	26	42	BDRE
82	220530	69	184	27.1718	Prostate: Radiation, Prostatectomy, Hormone	2020	RUL	no	no	none	74	M	WHITE	FORMER	Former	9	1983	2020	37	37	BDRE
83	220427	63	156	27.6339	None	2019	LB4	yes	yes	Adeno, stage IIIA	52	F	WHITE	CURRENT	Current	20		2019			BDRE
84	220517	75	259	32.3725	None	2020	LUL	yes	yes	Adeno carcinoma, Stage IA	75	M	WHITE	FORMER; QUIT 1990	Former	20	1990	2020	30	45	BDRE
85	220451	73	210	27.7059	Skin: WLE - Melanoma	2019	LINGULA	no	no	none	72	M	WHITE	FORMER	Former	15	1990	2019	29	43	BDRE
128	220553	68	157	23.8716	None	2020	LUL	yes	yes	Early Adeno Carcinoma	75	M	WHITE	FORMER; QUIT 2018	Former	100	2018	2020	2	73	BDRE
130	220581	69	209	30.8636	None	2021	LINGULA	no	no	none	64	M	WHITE	NEVER SMOKER	Never	0		2021			BDRE
132	220574	66	182	29.3753	None	2021	LUL	no	no	none	79	M	WHITE	FORMER; QUIT 1964	Former	6	1964	2021	57	22	BDRE
133	220352	70	206	29.5577	none	2019	RML	no	no	none	48	M	white	Former; QUIT 2006	Former	8.5	2006	2019	13	35	BDRE
134	220480	64	130	22.3142	None	2020	LLL	no	no	none	73	M	Unknown	Current	Current	60		2020			BDRE
136	203410	67	117	18.3246	None	2021	LUL	yes	yes	Squamous Cell Carcinoma	73	M	WHITE	FORMER; QUIT 2010	Former	50	2010	2021	11	62	BDRE
138	219773	73	205	27.0462	None	2021	RUL	yes	yes	Malignant	77	M	WHITE	CURRENT	Current	60		2021			BDRE
140	220592	70	180	25.8271	None	2021	LUL	yes	yes	Adenocarcinoma	74	M	WHITE	CURRENT	Current	51		2021			BDRE
143	220564	70	189	27.1184	None	2020	RML	yes	yes	Adenocarcinoma	75	M	WHITE	FORMER	Former	7.5	1995	2020	25	50	BDRE
144	220398	72	168	22.7847	None	2019	LUL	yes	yes	Adeno, stage IV	67	M	WHITE	CURRENT	Current	52		2019			BDRE
146	220623	66	246	39.7051	None	2021	RML	yes	yes	Adenocarcinoma in LLL	71	M	WHITE	NEVER SMOKER	Never	0		2021			BDRE
148	220580	74	148	19.0019	None	2021	LB6	no	no	none	58	M	BLACK	CURRENT	Current	40		2021			BDRE
150	220624	70	222	31.8534	None	2021	RML	no	no	none	75	M	WHITE	CURRENT	Current	50		2021			BDRE
152	220631	70	130	18.6529	None	2021	LUL	no	no	none	71	M	WHITE	CURRENT	Current	30		2021			BDRE
156	220561	69	246	36.3275	None	2020	LUL	yes	yes	adenocarcinoma	70	M	WHITE	CURRENT	Current	60		2020			BDRE
157	220295	69	187	27.6148	Tongue: Resection, Chemotherapy + Radiation (partial glossectomy, radiation + Chemo 2007)	2019	LUL	no	no	none	71	M	WHITE	FORMER; QUIT 2001	Former	40	2001	2019	18	53	BDRE
158	220391	72	200	27.1246	Kidney: Resection/Total Nephrectomy, Chemotherapy, Radiation	2019	LUL	yes	yes	renal cell metastasized to the lung	72	M	WHITE	FORMER	Former	20	1992	2019	27	45	BDRE
184	220599	72	188	25.4972	None	2021	LUL	yes	yes	Squamous Cell Lung Cancer	74	M	BLACK	FORMER	Former	50	2009	2021	12	62	BDRE
186	220608	72	156	21.1572	None	2021	LUL	yes	yes	Squamous Cell Lung Cancer	64	M	WHITE	FORMER	Former	67.5	2021	2021	0	64	BDRE
187	220348	69	200	29.5346	None	2019	LUL	yes	yes	Adeno, Stage IA	75	M	WHITE	FORMER; QUIT AGE 60	Former	20	2004	2019	15	60	BDRE
188	220359	72	223	30.244	None	2019	Lingula	yes	yes	Adeno, Stage IA	68	M	WHITE	FORMER ; QUIT AGE 33	Former	40	1984	2019	35	33	BDRE
324	220609	67	135	21.1438	None	2021	LLL	no	no	none	66	M	WHITE	Current	Current	55		2021			BDRE
326	220708	72	242	32.8208	None	2021	RML	yes	yes	Squamous Cell Lung Cancer	59	M	WHITE	Current	Current	40		2021			BDRE
328	220743	68	197	29.9535	None	2021	LUL	yes	yes	Squamous Cell Lung Cancer	78	M	WHITE	Former	Former	30		2021			BDRE
330	220612	71	175	24.4073	None	2022	RML	yes	yes	Squamous Cell Lung Cancer	72	M	WHITE	Current	Current	50		2022			BDRE
560	220745	74	191	24.5227	None	2022	LUL	yes	yes	Squamous Cell Carcinoma	72	M	BLACK		Current	46					BDRE
562	220725	75	180	22.4983	None	2022	RUL	yes	yes	Adenocarcinoma	75	M	BLACK		Former	10					BDRE
563	220780	73	250	32.9832	None	2022		no	no	none	62	M	WHITE		Former	20					BDRE
