# Supplementary material for: Context-dependent selection sculpts mutational landscapes in the normal lung
Source: Research Square preprint supplement (doi:10.21203/rs.3.rs-10195584/v1), 2026-07-02
Supplement: Supplementary file 3 [file e6ccbc8e3e88db90c29042e9.xlsx]

## Sheet: Sheet1
chr	start	end	gene
chr1	26760893	26761133	ARID1A
chr1	26766200	26766440	ARID1A
chr1	26773317	26773577	ARID1A
chr1	26778941	26779181	ARID1A
chr1	26779327	26779567	ARID1A
chr1	26779771	26780251	ARID1A
chr2	29223253	29225653	ALK
chr2	177233979	177234339	NFE2L2
chr2	211387020	211387260	ERBB4
chr2	211430941	211431181	ERBB4
chr2	211623872	211624112	ERBB4
chr2	211713504	211713744	ERBB4
chr2	211947414	211947654	ERBB4
chr3	41224446	41224726	CTNNB1
chr3	47083634	47083994	SETD2
chr3	47103269	47103509	SETD2
chr3	47121136	47121376	SETD2
chr3	179198817	179199297	PIK3CA
chr3	179199579	179199819	PIK3CA
chr3	179203654	179203894	PIK3CA
chr3	179204425	179204665	PIK3CA
chr3	179209527	179209767	PIK3CA
chr3	179210115	179210635	PIK3CA
chr3	179218182	179218422	PIK3CA
chr3	179221027	179221267	PIK3CA
chr3	179234103	179234383	PIK3CA
chr4	186609748	186609988	FAT1
chr4	186621481	186621721	FAT1
chr4	186709316	186709556	FAT1
chr6	117324233	117326513	ROS1
chr6	155239014	155241414	TIAM2
chr7	55173893	55174153	EGFR
chr7	55174651	55174891	EGFR
chr7	55181216	55181456	EGFR
chr7	55191706	55191946	EGFR
chr7	140753210	140753530	BRAF
chr7	140781489	140781729	BRAF
chr7	152176983	152177703	KMT2C
chr7	152185458	152185698	KMT2C
chr7	152229816	152230056	KMT2C
chr7	152235785	152236025	KMT2C
chr7	152247954	152248234	KMT2C
chr7	152265011	152265251	KMT2C
chr7	152273671	152273911	KMT2C
chr9	21970815	21971295	CDKN2A
chr9	21974612	21974892	CDKN2A
chr9	136496118	136496838	NOTCH1
chr9	136503111	136503391	NOTCH1
chr9	136504767	136505047	NOTCH1
chr9	136513361	136513601	NOTCH1
chr9	136514474	136514734	NOTCH1
chr9	136515264	136515684	NOTCH1
chr9	136515920	136516160	NOTCH1
chr9	136517199	136517439	NOTCH1
chr9	136517724	136517964	NOTCH1
chr9	136518091	136518331	NOTCH1
chr9	136518573	136518833	NOTCH1
chr9	136519337	136519577	NOTCH1
chr9	136522891	136523151	NOTCH1
chr9	136523669	136523949	NOTCH1
chr10	43114405	43116805	RET
chr10	87932872	87933352	PTEN
chr10	87952008	87952368	PTEN
chr10	87957756	87958116	PTEN
chr10	87960826	87961226	PTEN
chr11	108246952	108247192	ATM
chr11	108267142	108267382	ATM
chr11	108304616	108304856	ATM
chr11	108330112	108330352	ATM
chr11	108333835	108334075	ATM
chr11	108345667	108345907	ATM
chr11	108365240	108365480	ATM
chr12	25227162	25227462	KRAS
chr12	25245154	25245514	KRAS
chr12	45836709	45836989	ARID2
chr12	45837484	45837724	ARID2
chr12	45848760	45849000	ARID2
chr12	45851861	45852141	ARID2
chr12	49030632	49030872	KMT2D
chr12	49032076	49032316	KMT2D
chr12	49033750	49033990	KMT2D
chr12	49040172	49040412	KMT2D
chr12	49049887	49050147	KMT2D
chr12	49050643	49050883	KMT2D
chr13	48362728	48362968	RB1
chr13	48367393	48367633	RB1
chr13	48379503	48379703	RB1
chr13	48381299	48381539	RB1
chr13	48452913	48453153	RB1
chr13	48465119	48465359	RB1
chr14	65076450	65076690	MAX
chr14	65077886	65078126	MAX
chr14	65093643	65093883	MAX
chr17	7673411	7673929	TP53
chr17	7674080	7674360	TP53
chr17	7674755	7675324	TP53
chr17	7675853	7676213	TP53
chr17	31181636	31181876	NF1
chr17	31206178	31206418	NF1
chr17	31226346	31226586	NF1
chr17	31235526	31235796	NF1
chr17	31248974	31249214	NF1
chr17	31261584	31261854	NF1
chr17	31338618	31338858	NF1
chr17	31350090	31350330	NF1
chr17	31357189	31357429	NF1
chr17	39711835	39712075	ERBB2
chr17	39723256	39723496	ERBB2
chr17	39723847	39724087	ERBB2
chr17	39724640	39724880	ERBB2
chr17	39724999	39725239	ERBB2
chr18	44701477	44701717	SETBP1
chr18	44950677	44950917	SETBP1
chr18	44951823	44952063	SETBP1
chr18	44952603	44952843	SETBP1
chr18	45038449	45038689	SETBP1
chr18	45063271	45063511	SETBP1
chr18	51048640	51048920	SMAD4
chr18	51049187	51049427	SMAD4
chr18	51065414	51065654	SMAD4
chr18	51078212	51078492	SMAD4
chr19	1206938	1207218	STK11
chr19	1220304	1220793	STK11
chr19	1221201	1221441	STK11
chr19	1222916	1223196	STK11
chr19	10486599	10486839	KEAP1
chr19	10489647	10489887	KEAP1
chr19	10491569	10492289	KEAP1
chr19	10499428	10500008	KEAP1
chr19	10994830	10995070	SMARCA4
chr19	11021717	11021957	SMARCA4
chr19	11033254	11033534	SMARCA4
chr19	11060042	11060282	SMARCA4
chr22	28687827	28688067	CHEK2
chr22	28695711	28695951	CHEK2
chr22	28696839	28697079	CHEK2
chr22	28699809	28700049	CHEK2
chr22	28734351	28734591	CHEK2
